1 **A highly thermotolerant, trimeric SARS-CoV-2 receptor binding domain derivative**  
2 **elicits high titers of neutralizing antibodies**

3 Sameer Kumar Malladi<sup>a</sup>, Unnatiben Rajeshbhai Patel<sup>b</sup>, Randhir Singh<sup>b</sup>, Suman Pandey<sup>b</sup>, Sahil  
4 Kumar<sup>c</sup>, Savitha Gayathri<sup>a</sup>, Parismita Kalita<sup>a</sup>, Ishika Pramanick<sup>a</sup>, Poorvi Reddy<sup>b</sup>, Nidhi Girish<sup>b</sup>,  
5 Aditya Upadhyaya<sup>b</sup>, Mohammad Suhail Khan<sup>a</sup>, Madhuraj Bhat<sup>b</sup>, Shailendra Mani<sup>d</sup>, Sankar  
6 Bhattacharyya<sup>d</sup>, Samreen Siddiqui<sup>e</sup>, Akansha Tyagi<sup>e</sup>, Sujeet Jha<sup>e</sup>, Rajesh Pandey<sup>f</sup>, Somnath  
7 Dutta<sup>a</sup>, Rajesh P. Ringe<sup>c</sup>, Raghavan Varadarajan<sup>\*, a, g</sup>

8 <sup>a</sup> Molecular Biophysics Unit (MBU), Indian Institute of Science, Bengaluru, India

9 <sup>b</sup> Mynvax Private Limited, ES12, Entrepreneurship centre, SID, Indian Institute of Science,  
10 Bengaluru, India

11 <sup>c</sup> Virology Unit, Institute of Microbial Technology, Council of Scientific and Industrial  
12 Research (CSIR), Sector 39-A, Chandigarh 160036, India

13 <sup>d</sup> Translational Health Science and Technology Institute, NCR Biotech Science Cluster,  
14 3rd Milestone, Gurugram-Faridabad Expressway, Faridabad-121001

15 <sup>e</sup> Max Super Speciality Hospital (A Unit of Devki Devi Foundation), Max Healthcare, Delhi-  
16 1100017, India

17  
18 <sup>f</sup> Integrative GENomics of HOSt-PathogEn (INGEN-HOPE) laboratory, CSIR-Institute of  
19 Genomics and Integrative Biology (CSIR-IGIB), Mall Road, Delhi-110007, India

20

21 <sup>g</sup> Jawaharlal Nehru Centre for Advanced Scientific Research, Jakkur, Bengaluru, India

22 \* Corresponding author: Raghavan Varadarajan

23 *Email:* [varadar@iisc.ac.in](mailto:varadar@iisc.ac.in), *PHONE:* +91-80-22932612, *FAX:* +91-80-23600535

24

25 **Running title:** Thermotolerant trimeric RBD immunogen

26 **Keywords:** glycosylation, thermostable, ACE2

27

28 **Abstract**

29 The Receptor Binding Domain of SARS-CoV-2 is the primary target of neutralizing antibodies.  
30 We fused our previously described, highly thermotolerant glycan engineered monomeric RBD  
31 to a heterologous non-immunogenic trimerization domain derived from cartilage matrix  
32 protein. The protein was expressed at a good yield of ~80-100 mg/liter in Expi293 cells, as  
33 well as in both CHO and HEK293 stable cell lines. The designed trimeric RBD was observed  
34 to form homogeneous disulfide-linked trimers. When lyophilized, the trimer possessed  
35 remarkable functional stability to transient thermal stress of upto 100 °C and was stable to long  
36 term storage of over 4 weeks at 37 °C. Two immunizations with an AddaVax adjuvanted  
37 formulation elicited antibodies with high endpoint neutralizing titers against replicative virus  
38 with geometric mean titers of ~1114 and 1940 in guinea pigs and mice respectively. In  
39 pseudoviral assays, corresponding titers were ~3600 and ~16050, while the corresponding  
40 value for human convalescent sera was 137. Similar results were obtained with an Alhydrogel,  
41 CpG combination adjuvant. The same immunogen was expressed in *Pichia pastoris*, but this  
42 formed high molecular weight aggregates and elicited much lower ACE2 competing antibodies  
43 than mammalian cell expressed protein. The excellent thermotolerance, high yield, and robust  
44 immunogenicity of such trimeric RBD immunogens suggest that they are a promising modality  
45 to combat COVID-19.

46

47

48

49

50

51 **Importance**

52 SARS-CoV-2 is the causative agent of the ongoing COVID-19 pandemic. The viral surface  
53 exposed Spike glycoprotein is the target of neutralizing antibodies of which a major fraction  
54 targets the receptor binding domain (RBD). Thus RBD derived immunogens are attractive  
55 vaccine candidates. Monomeric, mammalian cell expressed RBD protein elicits low to  
56 moderate titers of neutralizing antibodies. We designed a highly expressed, trimeric RBD  
57 derivative with a non-immunogenic trimerization domain. In guinea pigs and mice  
58 respectively, this derivative induces 20-300 fold higher neutralizing antibody titers relative to  
59 convalescent human sera, while remaining conformationally intact after incubation for over  
60 four weeks at 37 °C and for ninety minutes at 100 °C when lyophilized. Such trimeric RBD  
61 formulations should not require a cold chain. Additionally, the high titers of neutralizing  
62 antibodies should buffer against viral sequence variation. These are both highly desirable  
63 attributes for a COVID-19 vaccine, especially in resource limited settings.

64

65

66

67

68

69

70

71

72

## 73 **Introduction**

74 The Coronavirus infectious disease 2019 (COVID-19) pandemic is caused by SARS-CoV-2  
75 (1, 2). SARS-CoV-2 has led to ~83.3 million infections and ~1.8 million deaths worldwide as  
76 on 4<sup>th</sup> January, 2020 (3). The viral spike glycoprotein is the most abundant protein exposed on  
77 the viral surface and the primary target of host elicited humoral immune responses (4, 5, 14,  
78 15, 6–13). Thus, there are a large number of COVID-19 vaccine candidates in various stages  
79 of development, with three candidates already granted emergency use authorisation. However,  
80 all of these are required to be stored either refrigerated or frozen. There is thus an unmet need  
81 for efficacious vaccines that can be stored for extended periods at room temperature. In  
82 addition, there are recent reports of new strains of the virus with enhanced transmissibility (16,  
83 17). This emphasizes the urgent need to develop vaccine formulations that elicit high titers of  
84 neutralizing antibodies to buffer against viral sequence variation (18–20). Spike glycoprotein,  
85 like various Class I viral surface glycoproteins assembles as a trimer with each protomer  
86 composed of the surface exposed S1 subunit and membrane anchored S2 subunit (21). The S1  
87 subunit consists of four independently folding domains: N-terminal domain (NTD), Receptor  
88 binding domain (RBD) and two short domains (SD1 and SD2) connected by linker regions (4,  
89 5, 22). The receptor binding domain (RBD) contains the receptor binding motif (residues 438-  
90 505) that facilitates interaction with the ACE2 receptor. Subsequent fusion or endocytosis is  
91 mediated by the fusion peptide that constitutes the N-terminal stretch of the S2 subunit (21). It  
92 is now well understood that the majority of neutralizing antibodies target the RBD (6, 7, 9, 10,  
93 23–28). Thus, various groups are involved in designing RBD-based immunogens (29, 30, 39,  
94 40, 31–38). We have previously designed a glycan engineered RBD derivative that was highly  
95 thermotolerant and induced moderate titers of neutralizing antibodies (35). Monomeric  
96 versions of immunogens elicit lower binding and neutralizing antibodies than multimeric  
97 version (29, 35, 38, 41). Potential strategies to improve neutralizing antibody titers include

98 fusion protein containing repetitive antigenic proteins, Fc fusion based dimerization,  
99 nanoparticle design and display strategies, and VLP based display platforms (36–43). While  
100 effective, several display strategies lead to significant antibody titers against the display  
101 scaffold or oligomerization motif, such antibodies might either show undesirable side effects  
102 in a small fraction of individuals or direct the response away from the intended target after  
103 repeated immunizations. In an alternative strategy, we fused our previously described  
104 thermotolerant RBD (35) to a trimerization motif, namely a disulphide linked coiled-coil  
105 trimerization domain derived from human cartilage matrix protein (hCMP) to the N-terminus  
106 of mRBD. This trimerization domain is expected to be much less immunogenic in small  
107 animals due to its homology with the corresponding ortholog, than other widely used  
108 trimerization domains of bacterial or synthetic origin such as foldon or IZ (44). hCMP-mRBD  
109 expressed as homogenous trimers, possessed comparable thermal stability profiles to the  
110 corresponding monomer (35) and remain functional after over 4 weeks upon lyophilization and  
111 storage at 37 °C. The RBD presented on the scaffold protein was highly immunogenic in mice  
112 and guinea pigs when formulated with AddaVax or alum derived adjuvants. Oligomerization  
113 increased neutralizing antibody titers by ~25-120 fold when compared with the titers in human  
114 convalescent sera, providing a proof of principle for the design strategy. Stable *CHO* and  
115 *HEK293* cell lines expressing hCMP-mRBD were constructed and the corresponding protein  
116 was as immunogenic as the protein expressed from transient transfection. The very high  
117 thermotolerance, enhanced immunogenicity and non-immunogenic trimerization domain  
118 suggest that this trimeric mRBD is an attractive vaccine candidate without requirement of a  
119 cold-chain to combat COVID-19, especially in resource limited settings.

120

121

## 122 **Results**

### 123 **Design of trimeric RBDs of SARS-CoV-2**

124 We previously designed a monomeric glycan engineered derivative of the receptor binding  
125 domain termed mRBD (residues 332-532 possessing an additional glycosylation site at N532)  
126 that induced neutralizing antibodies in guinea pig immunizations (35). It is known that  
127 oligomerization of the native antigens can induce higher titers of binding and neutralizing  
128 antibodies (38, 39, 42, 45–49). We therefore fused mRBD to the disulfide linked trimerization  
129 domain derived from human cartilage matrix protein (hCMP) (residues 298-340). We have  
130 previously used this domain to successfully trimerize derivatives of HIV-1 gp120. These earlier  
131 derivatives were used to successfully elicit high titers of broadly reactive antibodies in guinea  
132 pigs, and rabbits. In rhesus macaques when combined with an MVA prime, the formulation  
133 conferred protection against heterologous challenge, without apparent adverse effects (50–52).  
134 In the closed state structure model of Spike-2P protein (PDB 6VXX, residues 332-532), the  
135 three RBDs are in the down conformation. We therefore wished to explore if a trimeric RBD  
136 display fusion to the hCMP trimerization domain (residues 298-340), would improve  
137 neutralizing antibody titers relative to the corresponding monomer. We separated the coaxially  
138 aligned hCMP trimerization domain C-terminal residue 340. C $\alpha$  plane from the RBD N-  
139 terminal C $\alpha$  plane by  $\sim 22$  Å to eliminate any steric clashes (Figure 1A). The linker length was  
140 determined between the hCMP C-terminus residue 340 and RBD N-terminus residue 332 to be  
141 38.6 Å in the modeled structure (Figure 1A). An eleven amino acid linker derived from HIV-  
142 1 gp120 V1 loop (EGTMMRGELKN) with three additional residues (ASS) resulting in a  
143 fourteen amino acid linker L14 will comfortably span this distance. We have used this  
144 trimerization domain-linker combination in our previously described HIV-1 gp120 trimer  
145 design (53). Finally, the trimeric hCMP-mRBD design consisted of the N-terminal hCMP  
146 trimeric coiled coil domain (residues 298-340) fused to the I332 residue of mRBD by the above

147 linker, followed by the cleavable His tag sequence described previously(35). (Figure 1B). The  
148 hCMP trimerization domain leads to formation of covalently stabilized trimers crosslinked by  
149 interchain disulfides in the hCMP domain. This design is termed hCMP-mRBD and hCMP  
150 pRBD where the “m” and “p” signifies expression in mammalian or *Pichia pastoris* cells,  
151 respectively.

152

153 **Homogeneous trimers of hCMP-mRBD, possess comparable thermal stability to mRBD**  
154 **and lyophilized protein is stable at 37°C for at least four weeks**

155 The trimeric hCMP-mRBD was first expressed by transient transfection in Expi293F  
156 suspension cells, followed by single step metal affinity chromatography (Ni-NTA) and tag  
157 cleavage. The purified protein was observed to be pure and trimeric by reducing and non-  
158 reducing SDS-PAGE (Figure 2A, 2B). The protein exists as a homogenous trimer in solution  
159 and molar mass was determined by SEC-MALS as  $110 \pm 10$  kDa, consistent with the presence  
160 of nine glycosylation sites in the trimer (Figure 2A, 2C). Negative stain EM analysis confirmed  
161 the trilobed arrangement of RBD structure (Figure 3, Supplementary Figure 1).

162 Trimeric hCMP-mRBD was observed to have comparable thermal stability ( $T_m$ : 47.6 °C) as  
163 monomeric mRBD ( $T_m$ : 50.3 °C) (Figure 2D) and bound both its cognate receptor ACE2 and  
164 a SARS-CoV-1 neutralizing antibody CR3022 with very high affinity ( $K_D < 1$ nM) (Figure 2E)  
165 (35). hCMP-mRBD protein in solution was observed to retain functionality after 1hour  
166 exposure to temperatures as high as 70 °C (Figure 4A). The lyophilized trimeric mRBD was  
167 also observed to retain functionality to transient ninety minute thermal stress upto 99 °C (Figure  
168 4B). Further, the protein remained natively folded and retained functionality in solution upto  
169 three days, and upto four weeks in the lyophilized state upon incubation at 37 °C (Figure 5A,  
170 5B, 5C, 5D). Thermal tolerance to transient and extended thermal stress is a desirable

171 characteristic for deployment of vaccines in low resource settings in the absence of a cold-  
172 chain.

173

174 **AddaVax™ adjuvated trimeric mRBD elicits high titers of binding, receptor competing**  
175 **and neutralizing antibodies**

176 We assessed the immunogenicity of the trimeric hCMP-mRBD adjuvanted with both the MF59  
177 like adjuvant AddaVax™ as well as Alhydrogel in combination with CpG in both guinea pig  
178 and mice animal models. Animals were immunized intramuscularly at day 0, followed by a  
179 boost at day 21 and second boost at day 42 (35). Two weeks post first boost, sera were assayed  
180 for binding, ACE2 receptor competing, and neutralizing antibodies. In the AddaVax™  
181 adjuvanted group, mice were observed to elicit ~10-fold higher binding antibodies to mRBD  
182 compared to guinea pigs (GMT titer mice: 235253, guinea pig: 25600,  $p = 0.0476$ ) and hCMP-  
183 mRBD (GMT titer mice: 540470, guinea pig: 58813,  $p = 0.0397$ ) (Figure 6A, 6C). hCMP-  
184 mRBD immunized guinea pigs elicited 14-fold higher titers of Spike-2P binding antibodies  
185 (GMT: 44572) compared to monomeric mRBD immunized guinea pigs (GMT: 3200) from our  
186 previous study (35). Higher (16-fold) Spike-2P binding antibodies were induced in mice  
187 (GMT: 713155) compared to guinea pigs (GMT 44572)( $p = 0.0079$ ) with hCMP-mRBD  
188 (Figure 6B). Further, ACE2-hFc receptor competing titers (ID<sub>50</sub>) were assayed and mice sera  
189 contained ~3.5-fold higher titers compared to guinea pig sera (Mice sera GMT ID<sub>50</sub>: 2016 vs  
190 Guinea pig sera GMT ID<sub>50</sub>: 590,  $p =$  not significant (ns)) (Figure 6F). Overall, after two  
191 immunizations the formulation was less immunogenic in guinea pigs than mice and one of the  
192 guinea pigs showed a poor response, probably because one of the doses was improperly  
193 administered, since after a third immunization, all animals had increased and similar titers. We  
194 also assayed the binding titers directed towards the hCMP trimerization domain and gp120



215 derived linker by utilizing the previously described hCMP V1cyc JRFL gp120 containing the  
216 same trimerization domain (45) and JRFL gp120 as antigens respectively. Mice sera produced  
217 33-fold higher hCMP domain binding titers (GMT: 33779) compared to guinea pig sera (GMT:  
218 1009) ( $p = 0.0397$ ) (Figure 6D). Importantly, both mice and guinea pigs did not elicit any  
219 binding antibodies to the L14 linker derived from gp120 (Figure 6E). The total binding titer in  
220 ELISA measured against whole protein (ie; hCMP-mRBD) elicited in mice and guinea pigs  
221 are 16-fold and 58-fold higher ( $p = 0.0159$ ) respectively compared to the scaffold hCMP  
222 directed titers even after two immunizations (Figure 6D).

223 Trimeric mRBD adjuvanted with Alhydrogel in combination with CpG (TLR9 agonist)  
224 induced similar mRBD binding antibody titers in both mice and guinea pigs (GMT titer:  
225 102400) and 28-fold higher Spike-2P binding titers in mice (mice GMT titer: 409600 vs guinea  
226 pig: 58813,  $p = 0.0079$ ). hCMP-mRBD titers were 7-fold higher in mice (GMT titer in mice :  
227 409600 vs guinea pig : 58813,  $p = 0.0079$ ) with higher hCMP specific titers also being induced  
228 in mice (GMT titer in mice: 33779 vs guinea pig: 2111,  $p = 0.0079$ ). ACE2 receptor  
229 competition was assayed and mice sera competed 11-fold higher compared to guinea pig sera  
230 (GMT titer in mice: 7914 vs guinea pig: 712,  $p = 0.0079$ ) (Figure 6F). Pseudovirus  
231 neutralization titers in mice sera (GMT ID<sub>50</sub>: 42149 (Alhydrogel+CpG), 16048 (AddaVax™))  
232 were 2.4 - 4.5 fold higher compared to guinea pig sera (GMT ID<sub>50</sub>: 17930 (Alhydrogel+CpG),  
233 3582 (AddaVax™),  $p = ns$ ) (Figure 6G). These titers were considerably in excess of titers  
234 observed in convalescent patient plasma ( $p < 0.0001$ ) with the same pseudovirus neutralization  
235 assay (Figure 6G, Supplementary Figure 2C) which had a GMT of 137. Finally, replicative  
236 SARS-CoV-2 virus neutralization by CPE was assessed as described previously (35) and mice  
237 sera were observed to elicit 2-fold higher titers (NT<sub>100</sub> GMT: 761 (Alhydrogel +CpG), 1940  
238 (AddaVax™),  $p = ns$ ) compared to guinea pig (NT<sub>100</sub> GMT: 364 (Alhydrogel +CpG),  
239 1114(AddaVax™),  $p = ns$ ) (Figure 6H). Both pseudoviral and ACE2 competition titers

220 correlated well with each other and with ACE2 competition titers (Supplementary Figure 2A,  
221 2B, 2C). We conclude that hCMP mediated trimerization of mRBD led to elicitation of robust  
222 binding and neutralizing antibodies considerably in excess of those seen in convalescent sera.  
223 Additionally, we performed a dose sparing study involving 5  $\mu$ g hCMP-mRBD adjuvanted  
224 with AddaVax™. The binding titers were observed to be similar to the 20  $\mu$ g dose (GMT  
225 hCMP-mRBD:  $2.3 \times 10^5$ , GMT of Spike-2P:  $9.4 \times 10^5$ , GMT of hCMP-mRBD:  $7.1 \times 10^5$ ,  $p =$   
226 ns) (Supplementary Figure 3).

227 All four groups of mice and guinea pigs adjuvanted with either AddaVax or Alhydrogel in  
228 combination with CpG were boosted again at week 6 and two weeks after the boost sera was  
229 assayed. The AddaVax adjuvanted hCMP-mRBD elicited similar mRBD and Spike-2P binding  
230 titers (GMT: 1241675) and high ACE2 competing titers (mice GMT:13683, guinea pig GMT:  
231 9977,  $p = ns$ ) (Supplementary Figure 4A, 4F). The mice and guinea pigs elicited 21 and 111  
232 fold higher whole protein titers (mice GMT: 1638400, guinea pig GMT: 409600) relative to  
233 titers directed against the hCMP trimerization domain (mice GMT:77604, guinea pig  
234 GMT:3675,  $p = 0.0079$ ) (Supplementary Figure 4C, 4D). The Alhydrogel combined with CpG  
235 adjuvant groups continued to show markedly higher binding and competition titers in mice  
236 compared to guinea pigs ( $p = 0.0079$ ). The mRBD (mice GMT:1241675, guinea pig GMT:  
237 77604,  $p = 0.0079$ ) and Spike-2P (mice GMT:540470, guinea pig GMT: 19401,  $p = 0.0079$ )  
238 titers were 16 and 28-fold higher respectively in mice (Supplementary Figure 4A, 4B). In mice,  
239 the ACE2 competing titers exceeded guinea pig titers by ~4 folds (mice GMT: 7577, guinea  
240 pig GMT: 1975,  $p = 0.0079$ ) in the Alhydrogel +CpG formulation guinea pigs and mice elicited  
241 84 and 37 fold higher whole protein titers respectively (guinea pig GMT: 713155, mice GMT:  
242 1638400) relative to those elicited against the hCMP trimerization domain (guinea pig GMT:  
243 8445, mice GMT: 44572,  $p = 0.0079$ ) (Supplementary Figure 4C, 4D). None of the animals  
244 showed measurable gp120 binding titers. Animals remained healthy after the immunizations.

245 **Properties of hCMP-mRBD expressed from permanent cell lines to further clinical**  
246 **development of hMCP-mRBD**

247 Stable Chinese hamster ovary (*CHO*) and HEK293 suspension cell lines expressing the protein  
248 were constructed. Purified protein yields were 80-100 mg/liter, similar to those expressed in  
249 *Expi293* cells, and SDS-PAGE revealed the presence of disulfide linked trimers  
250 (Supplementary Figure 5). *CHO* expressed protein adjuvanted with SWE adjuvant (identical  
251 to AddaVax, but from a different manufacturer) was immunized in mice following a  
252 prime:boost:boost regime. The sera post first and second boost were assayed. The mRBD  
253 binding titers were similar (Week 5 GMT: 235253, Week 8 GMT: 409600,  $p = ns$ ) and Spike-  
254 2P binding titers were 12-fold higher at week 8 (GMT: 409600) compared to week 5 (GMT:  
255 33779) ( $p = 0.0079$ ) (Supplementary Figure 6A, 6B). The hCMP binding titers increased from  
256 2111 to 19400 at week 5 to 8 respectively ( $p = 0.0159$ ) (Supplementary Figure 6C). ACE2  
257 competing titers also increased from 982 to 4658 from week 5 to 8 respectively ( $p = 0.0079$ )  
258 (Supplementary Figure 6E). *CHO* expressed protein also did not induce any detectable gp120  
259 binding titers (Supplementary Figure 6D).

260 hCMP-pRBD protein was also expressed in the methylotrophic yeast *P. pastoris* at a purified  
261 yield of ~7mg/liter. As observed previously with monomeric RBD (35), the protein was more  
262 heterogeneous and formed high molecular weight aggregates than mammalian cell expressed  
263 proteins (Supplementary Figure 7A). In mice, formulations with the AddaVax equivalent  
264 adjuvant, SWE (54), elicited low mRBD, Spike reactive titers (Supplementary Figure 7B, 7C,  
265 7D) and hence this formulation was not pursued further.

266

267

268

## 269 **Discussion**

270 There are currently multiple COVID-19 vaccines that have been given emergency use approval  
271 and others with encouraging Phase I data (55) are in advanced clinical trials. However there  
272 remains a need for cheap, efficacious, COVID-19 vaccines that do not require a cold chain. We  
273 previously designed a thermotolerant, monomeric, glycan engineered RBD (residues 332-532)  
274 that elicited neutralizing antibodies. In the present study we sought to improve the  
275 immunogenicity without negatively altering biophysical and antigenic characteristics of the  
276 designed immunogen. We therefore designed a trimeric mRBD by fusion with the hCMP  
277 trimerization domain at the N-terminus of mRBD. Relative to other trimerization domains  
278 such as foldon and GCN4 derivatives (40, 56), this forms a trimer that is stabilized by  
279 intermolecular disulfides and hence will not dissociate, even at high dilutions. A fusion of  
280 hCMP with HIV-1 gp120 has been extensively tested in guinea pigs, rabbits and non-human  
281 primates as an HIV-1 vaccine candidate and showed promising immunogenicity without any  
282 apparent adverse effects (45, 51, 52). This trimerization sequence has sequence identities with  
283 the corresponding ortholog of 81 and 91% in mice and guinea pigs, consistent with the much  
284 lower hCMP titers in guinea pigs. Thus, the hCMP titers in humans are expected to be  
285 negligible, given 100% sequence identity with the host protein. Like our previously described  
286 monomeric mRBD, hCMP-mRBD shows remarkable thermotolerance. Lyophilized hCMP-  
287 mRBD was stable to extended storage at 37 °C for over four weeks and to transient 90 minute  
288 thermal stress of upto 100 °C. Trimerization of mRBD led to elicitation of 14 fold higher Spike-  
289 2P binding antibodies (hCMP-mRBD GMT: 44572.2 vs mRBD GMT: 3200) and 2.6 fold  
290 higher neutralizing antibodies (hCMP-mRBD GMT: 1114 vs mRBD GMT: 415) compared to  
291 those elicited by mRBD immunizations in guinea pigs from our previous study (35). No  
292 detectable antibodies were elicited against the short gp120 derived stretch present in the linker  
293 of hCMP-mRBD in either mice or guinea pigs. Neutralization titers produced are considerably

294 in excess of those seen in patient derived convalescent sera by factors of ~110 and ~306 folds  
295 in mice adjuvanted with AddaVax and Alhydrogel+CpG respectively (Figure 6). In mice, the  
296 formulation induced higher binding and neutralizing antibodies compared to guinea pigs,  
297 presumably owing to various differences in the two host immune systems. Trimeric RBD  
298 bound ACE2-hFc receptor and the conformation specific antibody CR3022 (57) tightly, with  
299 undetectable dissociation (Figure 2E). RBD-GCN4 trimers were recently used in receptor  
300 binding studies (40). The neutralization titers elicited by the present trimeric RBD compare  
301 well with pseudoviral neutralization titers produced by a two dose immunization schedule of  
302 nanoparticle displayed RBD adjuvanted with AddaVax (IC<sub>50</sub> GMT of 5 µg RBD-12GS-I53-  
303 50: 20000, corresponding IC<sub>50</sub> GMT of human convalescent sera: 60, ~330 fold higher  
304 compared to HCS) and the Novavax Spike-2P adjuvanted with Matrix-M1 in mice (CPE<sub>100</sub>  
305 GMT: 20000, CPE<sub>100</sub> HCS GMT: 983, ~20 fold higher compared to HCS) (38, 55).  
306 Additionally, hCMP-mRBD elicited higher neutralizing titers than a 5 µg mRNA based RBD-  
307 foldon trimer vaccine construct BNT162b1 tested in mice (IC<sub>50</sub> GMT: 753, HCS IC<sub>50</sub> GMT:  
308 94, ~8 fold higher compared to HCS) (56). The already high Ace2 competition titers elicited  
309 after two immunizations were significantly boosted after a third immunization (Figure 6,  
310 Supplementary Figure 4F, 6E, 7D). In contrast to recently described, highly immunogenic  
311 multi-component nanoparticle systems (37, 38), the present single component, trimeric RBD  
312 might be easier to purify and manufacture and in humans should elicit a higher proportion of  
313 RBD directed antibodies because of its host derived trimerization sequence. In summary, the  
314 present study describes the design of a disulfide linked trimeric immunogen that is stable to  
315 long term thermal stress and induces robust neutralizing antibodies against SARS-CoV-2. The  
316 availability of permanent cell lines for the immunogen, now make it possible to proceed with  
317 further clinical development of this thermotolerant and highly immunogenic COVID-19  
318 vaccine candidate.

## 319 **Materials and Methods**

### 320 **Trimeric RBD, ACE2-hFc and antibody expression constructs**

321 The present trimeric mRBD construct consists of an N-terminal trimerization domain of human  
322 cartilage matrix protein (hCMP) (hCMP residues 298-340) (accession number AAA63904)  
323 linked by a 14-residue flexible linker (ASSEGTMMRGELKN) derived from the V1 loop of  
324 HIV-1 JR-FL gp120 linked to RBD residues 332-532 (accession number YP\_009724390.1)  
325 with an engineered glycosylation site (NGS) at N532 fused to an HRV-3C precision protease  
326 cleavage site linked to a 10x Histidine tag by a GS linker. This construct is named hCMP-  
327 mRBD and was cloned into the mammalian expression vector pCMV1 under control of a CMV  
328 promoter and efficient protein secretion was enabled by the tPA secretion signal peptide  
329 sequence. The hCMP-mRBD construct reincorporated a glycosylation motif “NIT” at the N-  
330 terminal of the mRBD recapitulating the native glycosylation site at N331 in SARS-CoV-2  
331 RBD. CR3022 antibody heavy and light chain genes were synthesised and subcloned into  
332 pcDNA3.4 vector by Genscript (USA).

333

### 334 **Purification of recombinant proteins expressed in *Expi293F* cells**

335 hCMP-mRBD protein was purified from transiently transfected Expi293F cells following  
336 manufacturer’s guidelines (Gibco, Thermofisher) as described previously (35). Briefly, 24  
337 hours prior to transfection, cells were passaged at a density of  $2 \times 10^6$  cells/mL into prewarmed  
338 Expi293F expression media. On the day of transfection, cells were freshly diluted at a density  
339 of  $4 \times 10^6$  cells/mL and transiently transfected with the desired plasmids. Plasmid DNA ( $1 \mu\text{g}$   
340 per 1mL of Expi293F cells) was complexed with ExpiFectamine293 and transiently transfected  
341 into Expi293F cells. Post 18-20 hr, Enhancer 1 and 2 addition was performed following the  
342 manufacturer’s protocol. At three days following transfection, spent media was utilized for

343 purification of secreted protein by Ni Sepharose 6 Fast flow affinity chromatography resin (GE  
344 Healthcare). PBS (pH 7.4) equilibrated column was bound with two-fold diluted supernatant.  
345 Protein bound resin was washed with ten-column volumes of 1xPBS (pH7.4) supplemented  
346 with 25mM imidazole. Bound protein was eluted in a gradient of 200-500 mM imidazole  
347 supplemented PBS (pH 7.4). Eluted proteins were dialysed against PBS (pH 7.4) using a  
348 dialysis membrane of 3-5kDa (MWCO) (40mm flat width) (Spectrum Labs). Protein  
349 concentration was determined by absorbance ( $A_{280}$ ) using NanoDrop™2000c with the  
350 theoretical molar extinction coefficient calculated using the ProtParam tool (ExpASy).

351

### 352 **Expression and Purification of hCMP-pRBD**

353 The construct sequence was codon-optimized for expression in *Pichia Pastoris* and cloned  
354 into the vector pPICZ $\alpha$ A containing a MAT $\alpha$  signal sequence for efficient secretion. The  
355 resulting clone was named pInCV21R. The pInCV21R plasmid was linearized with *PmeI*  
356 enzyme (NEB, R0560) prior to transformation.

357 10  $\mu$ g of linearized plasmid was used for transformation into *Pichia pastoris* X-33 strain by  
358 electroporation as described in the user manual for Pichia expression by Thermo Fisher  
359 Scientific. The transformants were selected by plating on YPDS (YPD Sorbitol) plates with  
360 100  $\mu$ g/ml and 1mg/ml Zeocin (Thermo Fisher Scientific, R25005) and incubating the plates  
361 at 30 °C for upto 3 days.

362 25 colonies from the YPDS plate with 1 mg/ml Zeocin were picked and screened for expression  
363 by inducing with 1 % methanol every 24 hrs. Culture tubes (15 ml) with 1ml BMMY media  
364 (pH 6.0) each were used for inducing the cultures for upto 120 hrs at 30 °C and 250 rpm. The  
365 expression levels were checked using a dot blot analysis with Anti-his tag antibodies  
366 conjugated with HRP enzyme. The colony showing the highest expression level was then

367 chosen for large scale expression. The large scale culture was grown in 2l baffled shake flasks  
368 with 350 ml volume of culture. The expression levels were monitored every 24 hrs using  
369 Sandwich-ELISA.

370 The culture was harvested by centrifugation at 12000g, and the supernatant was filtered through  
371 a 0.45 micron filter. The supernatant was then incubated with Ni Sepharose 6 Fast flow resin  
372 (GE Healthcare) for 2 hrs. The beads were washed with 50 column volumes of 1X PBS pH 7.4  
373 supplemented with 20 mM Imidazole. The His tagged protein was then eluted using 1X PBS  
374 pH 7.4 supplemented with 300 mM Imidazole. The eluted fractions were assessed for purity  
375 on a 12 % SDS-PAGE. The appropriate fractions were then pooled and dialyzed against 1X  
376 PBS to remove Imidazole.

377

#### 378 **Tag removal**

379 HRV-3C precision protease digestion was performed to remove the C-terminal 10xHis tag  
380 (hCMP-mRBD: HRV-3C = 50:1). HRV-3C digestion was performed for 16 hrs at 4 °C in  
381 PBS (pH 7.4). Ni Sepharose 6 Fast flow resin (GE Healthcare) affinity exclusion  
382 chromatography was performed to obtain the tagless protein (containing the tag C-terminal  
383 sequence: LEVLFQ). The unbound tagless proteins concentration was determined by  
384 absorbance ( $A_{280}$ ) using NanoDrop™2000c with the theoretical molar extinction coefficient  
385 calculated using the ProtParam tool (ExpASy).

386

#### 387 **Cell lines, media and growth conditions for polyclonal stable cell lines**

388 Flp-In™-293 (Thermo Fisher Scientific, Cat# R75007, Lot# 2220695) as well as Flp-In™-  
389 CHO (Thermo Fisher Scientific, Cat# R75807, Lot # 2127131) adherent cells were used for  
390 making COVID-19 antigen hCMP-mRBD-HRV-Tg (a stop codon after 'Q' of HRV3C site



391 LEVLFQGP) polyclonal stable cell line. The cell line encoded hCMP-mRBD sequence is thus  
392 identical to that obtained after tag removal following HRV3C protease cleavage of protein  
393 produced by transient transfection. These engineered cells harbour a single Flp-In™ target site  
394 from vector ‘pFRT/lacZeo’ which confers Zeocin resistance. We first engineered COVID-19  
395 antigen expressing recombinant cells using these adherent cells and then adapted them to  
396 suspension conditions for protein production.

397

### 398 **Adherent cell culture**

399 Both of the above adherent cells were cultured either in T25 or T75 EasYFlask, with a TC  
400 surface, filter cap (Thermofisher Scientific Cat# 156367 and 156499) in a moist 8 % CO<sub>2</sub>  
401 incubator at 37 °C.

402 The adherent Flp-In™-293 cells were grown in DMEM, high glucose media (Thermo Fisher  
403 Scientific Catalog #: 11965118) supplemented with 10 % Fetal Bovine Serum (FBS), qualified  
404 Brazil (Thermo Fisher Scientific Cat# 10270106), 100 U/ml Penicillin Streptomycin (Thermo  
405 Scientific Cat#15140122) and 100 µg/ml Zeocin™ Selection Reagent (Thermofisher Scientific  
406 Cat# R25001).

407 The adherent Flp-In™-CHO cells were grown in Ham's F-12 Nutrient Mix media (Thermo  
408 Fisher Scientific Catalog #: Cat # 11765054) supplemented with 10% FBS, 100 U/ml  
409 Penicillin-Streptomycin and 100 µg/ml Zeocin™ Selection Reagent.

410

### 411 **Plasmid and vector**

412 The Flp-In™ T-REx™ core kit containing pOG44 (Flp recombinase expressing plasmid) and  
413 pcDNA5/FRT/TO (donor plasmid for gene of interest) was purchased from Invitrogen USA  
414 (Cat # K650001).

415 The gene of interest ‘hCMP-mRBD-HRV-Tg’ was PCR amplified from hCMP-mRBD  
416 pCMV1 vector using HindIII site containing forward primer (5’—  
417 TATATAAAGCTTCTGCAGTCACCGTCCTTAGATC—3’) and XhoI site containing reverse  
418 primer (5’—TATATCTCGAGTCACTGGAACAGCACCTCCAGGGAGCC—3’).

419 The amplified PCR product was digested with *HindIII* and *XhoI* and subcloned into  
420 pcDNA5/FRT/TO restricted with the above two enzymes. The clone was confirmed by  
421 sequencing.

422

### 423 **Generation of adherent polyclonal Flp-In stable lines**

424 T25 flasks (5 ml media) having either adherent Flp-In<sup>TM</sup>-293 or Flp-In<sup>TM</sup>-CHO cells (~80 %  
425 confluent) were co-transfected with pOG44 (10 µg) and hCMP-mRBD-HRV-Tg-  
426 pcDNA5/FRT/TO (5µg) plasmid DNA using 35 µg of Lipofectamine<sup>TM</sup> 2000 Transfection  
427 Reagent (Thermo Fisher Scientific, Cat # 11668030) in serum free media as per the  
428 manufacturers instruction for 4 hr. After 4 h, the media was replaced with serum containing  
429 media. The cells were incubated for 16 h and then trypsinized using 1 ml of 1X-Tryple express  
430 enzyme (Thermofisher Scientific, Cat# 12604021) and seeded to a T75 flask containing 25 ml  
431 of desired media and incubated for further 24 h for FLP recombination. After 24h the media  
432 was replaced with fresh media having Hygromycin 100 µg/ ml (Thermofisher Scientific Cat#  
433 10687010) for Flp-In<sup>TM</sup>-293 and 750 µg/ ml for Flp-In<sup>TM</sup>-CHO cells. Hygromycin resistant  
434 foci were observed after 3 days of selection. Media containing the desired amount of  
435 Hygromycin was changed after every 5 days mentioned above. After 18 days in case of Flp-  
436 In<sup>TM</sup>-293 and 14 days in case of Flp-In<sup>TM</sup>-CHO, the recombinant hygromycin resistant cells  
437 reached to 100% confluency. The secretion of the protein of interest (hCMP-mRBD-HRV-Tg)  
438 was confirmed from cell free media using western blotting with polyclonal Guinea pig sera  
439 against the same antigen. The confirmed polyclonal cells were frozen in liquid N<sub>2</sub> for long term

440 storage. The T75-flask grown polyclonal cells were adapted for shake flask suspension culture  
441 and used for protein production.

442

#### 443 **Shake flask suspension cell culture and protein production**

444 The suspension cells were grown in 125 or 250-ml Nalgene™ single-use PETG Erlenmeyer  
445 flasks with plain bottom and vented closure (Thermofisher Scientific Cat# 4115-0125 or 4115-  
446 0250) at 125 rpm with moist 8% CO<sub>2</sub> incubator at 37°C or as specifically mentioned.

447 The stable adherent recombinant Flp-In™-293 cells were first trypsinized from the T75 flask  
448 and then grown in a suspension flask after adapting them to FreeStyle™ 293 Expression  
449 Medium (Thermofisher Scientific Cat# 12338018) supplemented with 2% FBS and 50 µg/ml  
450 Hygromycin B for ~6 generations (two passages, doubling time=24h). These ~300 million cells  
451 were then seeded to 100 ml serum free FreeStyle™ 293 Expression medium for protein  
452 production for 3 days. After 3 days the media was used for protein purification. The ~300  
453 million cells were grown further in 100 ml media for 6 days under identical conditions and  
454 used again for protein purification with >95% cell viability.

455 The stable adherent recombinant Flp-In™-CHO cells were first trypsinized from a T75 flask  
456 and then grown in a suspension flask for direct adaptation to PowerCHO™ 2 Serum-free  
457 Chemically Defined Medium (Lonza, Cat# 12-771Q) supplemented with 8 mM L-Glutamine  
458 (Thermo Fisher Scientific, Cat# 25-030-081) with 50 µg/ml Hygromycin B. First cells were  
459 grown for ~8 generations (two passages, doubling time=24h) at 37 °C till ~3 million per ml  
460 density. ~300 million cells were then seeded in 100 ml medium for protein production for 3  
461 days at 32°C. After 3 days the media was harvested for protein purification. The ~300 million  
462 cells were grown further in 100 ml media for 6 days under identical condition and media used  
463 for protein purification with >95% cell viability.

## 464 **Tagless protein purification**

465 The spent media from stable hCMP-mRBD-HRV-Tg-Flp-In<sup>TM</sup>-293 or Flp-In<sup>TM</sup>-CHO grown  
466 cells contained the expressed protein. Protein was purified using anion exchange  
467 chromatography. 100 ml cell free media was first dialyzed against 30mM Tris-HCl buffer pH  
468 8.4 overnight at 4 °C using cellulose membrane dialysis tubing (10kDa molecular weight  
469 cutoff, Sigma, Cat # D9527-100FT). 2mL Q Sepharose<sup>TM</sup> Fast Flow beads (GE Healthcare,  
470 Cat# 17-0510-01) were equilibrated with 30mM Tris-HCl pH 8.4 and incubated for 1h at 4°C  
471 with the dialyzed sample. Protein elution was performed with a step gradient of 30mM Tris-  
472 Hcl pH 8.4. containing 20-500mM NaCl. The fractions were analyzed on a 10% SDS-PAGE  
473 gel and the pure fractions were pooled and further dialyzed against 1X-PBS buffer pH 7.4,  
474 overnight. The pure protein was analyzed on 10% oxidizing as well as reducing SDS PAGE  
475 for homogeneity and purity. Size exclusion chromatography utilizing Superose 6 10/300  
476 Increase GL column with 1X PBS as running buffer at a flow rate of 0.5mL/ min on an  
477 ÄktaPure (GE) was performed to determine protein aggregation state.

478

479 **SDS-PAGE analysis, Size exclusion chromatography (SEC) and SEC-MALS** Protein purity  
480 was estimated by denaturing PAGE. Samples were denatured in SDS containing sample buffer  
481 by boiling in reducing (with  $\beta$ -mercaptoethanol) or non-reducing (without  $\beta$ -mercaptoethanol)  
482 conditions.

483 SEC profiles were obtained in 1xPBS buffer equilibrated analytical gel filtration Superdex-200  
484 10/300GL column (GE healthcare) on an Äkta pure chromatography system. The peak area  
485 under the curve (AUC) was determined in the Evaluation platform using the peak integrate  
486 tool. For SEC-MALS (multi angle light scattering), a PBS (pH 7.4) buffer equilibrated  
487 analytical Superdex-200 10/300GL gel filtration column (GE healthcare) on a SHIMADZU  
488 HPLC was utilized to resolve hCMP-mRBD purified protein. Gel filtration resolved protein

489 peaks were subjected to in-line refractive index (WATERS corp.) and MALS (mini DAWN  
490 TREOS, Wyatt Technology corp.) detection for molar mass determination. The acquired data  
491 from UV, MALS and RI were analysed using ASTRA™ software (Wyatt Technology).

492

#### 493 **nanoDSF thermal melt studies**

494 Equilibrium thermal unfolding of hCMP-mRBD (- 10xHis tag) protein, before or after thermal  
495 stress was carried out using a nanoDSF (Prometheus NT.48) as described previously(35). Two  
496 independent measurements were carried out in duplicate with 2-4 µM of protein in the  
497 temperature range of 15-95 °C at 100% LED power and initial discovery scan counts (350nm)  
498 ranging between 5000 and 10000. In all cases, when lyophilized protein was used, it was  
499 reconstituted in water, prior to DSF.

500

#### 501 **Negative Staining sample preparation and visualization by Transmission Electron** 502 **Microscope**

503 For visualization by a Transmission Electron Microscope, the sample was prepared by a  
504 conventional negative staining method. Briefly, the carbon-coated copper grid was glow  
505 discharged for 20 seconds at 20mA using Quorum GlowQube. Around 3.5 µl of hCMP-mRBD  
506 sample (0.1mg/ml) was added to the freshly glow discharged carbon-coated copper grid for 1  
507 minute. The extra sample was blotted out. Negative staining was performed using freshly  
508 prepared 1% Uranyl Acetate solution for 20 seconds and the grid was air-dried before TEM  
509 imaging. The negatively stained sample was visualized at room temperature using a Tecnai  
510 T12 electron microscope equipped with a Tungsten filament operated at 120 kV. Images were  
511 recorded using a side-mounted Olympus VELITA (2KX2K) CCD camera at a calibrated 3.54  
512 Å/pixel.

513

514 **Reference-free 2D classification using single-particle analysis**

515 The evaluation of micrographs was done with EMAN 2.1 (58). Around 6600 particles were  
516 picked manually and extracted using e2boxer.py in EMAN2.1 software. Reference free 2D  
517 classification of different projections of particle were calculated using simple\_prime2D of  
518 SIMPLE 2.1 software (59).

519

520 **SPR-binding of hCMP-mRBD analyte to immobilized ACE2-hFc/CR3022**

521 hCMP-mRBD protein kinetic binding studies to ACE2-hFc and CR3022 antibody were  
522 performed on a ProteOn XPR36 Protein Interaction Array V.3.1 (Bio-Rad). The GLM sensor  
523 chip was activated with sulfo-NHS and EDC (Sigma) reaction. Protein G (Sigma) was  
524 covalently coupled following activation. ~3500-4000 RU of Protein G (10 µg/mL) was coupled  
525 in 10mM sodium acetate buffer pH 4.5 at a flow rate of 30 µl/min for 300 seconds in desired  
526 channels. Finally, 1M ethanolamine was used to quench the excess sulfo-NHS esters.  
527 Following quenching, ligand immobilization was carried out at a flow rate of 5 µg/mL for 100  
528 seconds. ACE2-hFc or CR3022 were immobilized at ~800 RU on desired channels excluding  
529 a single blank channel that acts as the reference channel. hCMP-mRBD analyte interaction with  
530 ligands was monitored by passing over the chip at a flow rate of 30 µL/min for 200 seconds,  
531 and the subsequent dissociation phase was monitored for 600 seconds. An empty lane without  
532 ligand immobilization was utilized for measuring non-specific binding. Following each kinetic  
533 assay, regeneration was carried out with 0.1 M Glycine-HCl (pH 2.7). The ligand  
534 immobilization cycle was repeated prior to each kinetic assay. Various concentrations of the  
535 hCMP-mRBD (- 10xHis tag) (100 nM, 50 nM, 25 nM, 12.5 nM, 6.25 nM) in 1x PBST were  
536 used for binding studies. The kinetic parameters were obtained by fitting the data to a simple  
537 1:1 Langmuir interaction model using Proteon Manager.

538

539 **SPR-binding of thermal stress subjected hCMP-mRBD analyte to immobilized ACE2-**  
540 **hFc**

541 Lyophilized protein or protein in 1X PBS (0.2 mg/mL) was subjected to transient thermal  
542 incubation at the desired temperature in a thermal cycler for ninety or sixty minutes,  
543 respectively. Post thermal incubation, binding response was assessed at 100nM analyte  
544 concentration by SPR as mentioned in the previous section.

545

546 **Mice and Guinea Pig Immunizations**

547 Immunizations of BALBc mice (n=5/group, female, 3-4 weeks old, ~16-18 g) and Hartley  
548 strain guinea pigs (n=5/group, female, 6-8 weeks old, ~300 g) were performed with freshly  
549 adjuvanted (AddaVax™ (vac-adx-10)) protein (1:1 v/v Antigen : AddaVax™ ratio per  
550 animal/dose, 20 µg protein in 50 µl PBS (pH 7.4) and 50 µl AddaVax™) (InvivoGen, USA).  
551 Animals were immunized via the intramuscular route with two doses constituting prime and  
552 boost on Day 0 and 21 respectively. Sera were isolated from bleeds drawn prior to prime (day  
553 -2), post prime (day 14) and post boost (day 35). All animal studies were approved by the  
554 Institutional Animal Ethics committee (IAEC) (RR/IAEC/61-2019, Invivo/GP/084). In the  
555 case of Pichia expressed protein, the AddaVax equivalent adjuvant SWE was used.

556

557 **ELISA- serum binding antibody end point titers**

558 Desired antigens were coated (4 µg/mL, 50 µL/well, 1xPBS) on 96 well plates for two hours  
559 and incubated on a MixMate thermomixer (Eppendorf, USA) at 25 °C under constant shaking  
560 (300 rpm). Antigen immobilization was assessed by coating ACE2-hFc protein. Coated wells  
561 were washed with PBST (200µl/well) four times, and blocked using blocking solution (100  
562 µL, 3% skimmed milk in 1xPBST) and then incubated at 25 °C for one hour, 300 rpm. Post  
563 blocking, antisera were diluted four-folds serially, starting 1:100 and incubated at 25 °C for 1

564 hour, 300 rpm. Post sera binding, three washes were performed (200  $\mu$ L of 1xPBST/well).  
565 Following this, anti-Guinea Pig IgG secondary antibody (ALP conjugated, Rabbit origin)  
566 (diluted 1:5000 in blocking buffer) (50  $\mu$ L/well) was added and incubated at 25  $^{\circ}$ C for 1 hour,  
567 300 rpm (Sigma-Aldrich). Post incubation, four washes were performed (200  $\mu$ L of  
568 1xPBST/well) and incubated with pNPP liquid substrate (50  $\mu$ L/well) (pNPP, Sigma-Aldrich)  
569 at 37  $^{\circ}$ C for 30 minutes, 300 rpm. Finally, the chromogenic signal was measured at 405 nm.  
570 The highest serum dilution possessing signal above cutoff (0.2 O.D. at 405 nm) was considered  
571 as the endpoint titer for ELISA.

572

### 573 **ACE2-hFc competition ELISA**

574 ACE2-hFc competition was performed as described previously (35). ELISA was Monomeric  
575 mRBD antigen was coated on 96 well plates and incubated at 25  $^{\circ}$ C (4  $\mu$ g/mL in 1x PBS, 50  
576  $\mu$ L/well), overnight under constant shaking (300 rpm) on a MixMate thermomixer (Eppendorf,  
577 USA). Negative control wells were coated with Ovalbumin (4  $\mu$ g/mL in 1x PBS, 50  $\mu$ L/well).  
578 Following four washes with 1xPBST, the coated wells were blocked with blocking solution  
579 (100  $\mu$ L 3% skimmed milk in 1xPBST) and incubated at 25  $^{\circ}$ C for 1 hour, 300 rpm. Post  
580 blocking, sera competition wells were incubated with two-fold serial dilutions of anti-sera  
581 (60 $\mu$ L) starting at a dilution of 1:10 and control wells were incubated with blocking solution  
582 alone. Post one hour incubation at 25 $^{\circ}$ C, 300 rpm, three washes were performed with 1xPBST  
583 (200  $\mu$ L of 1xPBST/well). An additional blocking step was performed at 25 $^{\circ}$ C, 300 rpm for 1  
584 hour. Post blocking, ACE2-hFc was added in excess (60  $\mu$ L at 20 $\mu$ g/mL) and incubated at 25  
585  $^{\circ}$ C, for 1 hour, 300 rpm. Next, three washes were performed (200  $\mu$ L of PBST/well) and anti-  
586 Human IgG secondary antibody (Sigma-Aldrich) (ALP conjugated, Rabbit origin, diluted  
587 1:5000 in blocking buffer) was added (50  $\mu$ L/well) and incubated at 25  $^{\circ}$ C for 1 hour, 300 rpm.  
588 Following secondary antibody binding, four washes were performed (200  $\mu$ L of PBST/well).



589 pNPP liquid substrate (50  $\mu$ L/well) was added and incubated for 30 minutes at 37 °C, 300 rpm.

590 Finally, the chromogenic signal was measured at 405 nm. The percent competition was

591 calculated using the following equation:

$$592 \quad \% \text{ competition} = [A(\text{Control}) - A(\text{Sera Dilution})] * 100 / [A(\text{Control})] .$$

593 Where, A(Control) is the Absorbance of binding signal of ACE2-Fc and mRBD in the absence

594 of sera, A (Sera dilution) is the Absorbance of binding signal of ACE2-hFc and mRBD

595 preincubated with antisera.

596

### 597 **Convalescent patient sera samples**

598 Convalescent patient sera were drawn (n = 40) and assayed for pseudoviral neutralization as

599 described in the following pseudovirus neutralization section. The ethics approval of human

600 clinical samples were approved by Institute Human Ethical Committee (Approval No: **CSIR-**

601 **IGIB/IHEC/2020-21/01**)

602

### 603 **CPE based viral Neutralization assay**

604 Mice and Guinea pig pre-immune (negative control) sera and post boost sera were assayed for

605 virus neutralization. Sera were heat inactivated prior to performing the assay by incubation at

606 56 °C for one hour. 100TCID<sub>50</sub> of replicative SARS-CoV-2 (Isolate: USA-WA1/2020) virus

607 (50  $\mu$ L) and serum were premixed and incubated for one hour at 37°C in a 5% CO<sub>2</sub> incubator.

608 The virus-serum incubated premix samples were serially diluted and plated in duplicates in

609 VeroE6 cell containing 96 well plate (10<sup>4</sup>/well) and cultured for 48/96 hours. Post incubation,

610 virus induced cytopathic effect (CPE) was assessed and the neutralization titre was deemed as

611 the highest serum dilution at which no CPE was observed under the microscope.

612

613

## 614 **Production of Pseudotyped SARS-CoV-2 and pseudovirus neutralization assay**

615 Pseudo viral neutralization assays were performed with SARS-CoV-2 pseudo virus harbouring  
616 reporter NanoLuc luciferase gene. Briefly, HEK293T cells were transiently transfected with  
617 plasmid DNA pHIV-1 NL4.3 $\Delta$ env-Luc and Spike- $\Delta$ 19-D614G by using Profection  
618 mammalian transfection kit (Promega Inc) following the instructions in the kit manual. Post 48  
619 hours, the pseudovirus containing culture supernatant was centrifuged for 10 mins at 600 xg  
620 followed by filtration via 0.22  $\mu$ m filters, and stored at -80 °C until further use. 293T-hACE-2  
621 (BEI resources, NIH, Catalog No. NR-52511) or Vero/TMPRSS2 (JCRB cell bank, JCRB  
622 #1818) cells expressing the ACE2 or ACE and TMPRSS2 receptors respectively were cultured  
623 in DMEM (Gibco) supplemented with 5 % FBS (Fetal Bovine Serum), penicillin-streptomycin  
624 (100 U/mL). Patient derived convalescent sera (n = 40) were tested for neutralization in both  
625 293T-ACE-2 and Vero/TMPRSS2 cells whereas animal sera were tested only in  
626 Vero/TMPRSS2 cells. Neutralization assays were done in two replicates by using heat-  
627 inactivated animal serum or human COVID-19 convalescent serum (HCS). The pseudovirus  
628 (PV) was incubated with serially diluted sera in a total volume of 100  $\mu$ L for 1 hour at 37 °C.  
629 The cells (Vero/TMPRSS2 or 293T-hACE2) were then trypsinised and  $1 \times 10^4$  cells/well were  
630 added to make up the final volume of 200 $\mu$ L/well. The plates were further incubated for 48  
631 hours in humidified incubator at 37 °C with 5% CO<sub>2</sub>. After 48 hours of incubation, 140  $\mu$ L  
632 supernatant was removed and 50  $\mu$ L Bright-Glo luciferase substrate (Promega Inc.) was added.  
633 After 2-3 minute incubation, 80  $\mu$ L lysate was transferred to white plates and luminescence  
634 was measured by using Cytation-5 multi-mode reader (BioTech Inc.) The luciferase activity  
635 measured as Relative luminescence units (RLU) from SARS-CoV-2 pseudovirus in the  
636 absence of sera was used as reference for normalizing the RLUs of wells containing sera.  
637 Pseudovirus neutralization titers (ID<sub>50</sub>) were determined as the serum dilution at which  
638 infectivity was blocked by 50%.

639 **Statistical Analysis**

640 The  $p$  values for ELISA binding titers, neutralization titers, ACE2 receptor competition titers  
641 were analysed with a two-tailed Mann-Whitney test using the GraphPad Prism software. The  
642 correlation coefficients for ACE2-hFc receptor competition, pseudovirus, live virus and 293T-  
643 ACE2/VeroE6-TMPRSS2 cell line pseudovirus neutralizations were analysed by Spearman  
644 correlation using the GraphPad Prism software.

645

646 **Data Availability Statement**

647 All the data are in the manuscript.

648

649 **Declaration of Competing Interest**

650 A provisional patent application has been filed for the RBD formulations described in this  
651 manuscript. R.V, S.K.M, S.P, R.S are inventors. R.V is a co-founder of Mynvax and S.P, R.S,  
652 U.R.P, P.R., M.D., N.G, and A.U are employees of Mynvax Private Limited.

653

654 **Acknowledgements**

655 We thank Dr. Neil King for kindly providing the ACE2-hFc fusion protein, and Drs. Lynda  
656 Stuart, and Dr. Harry Kleanthous of the Bill and Melinda Gates foundation for helpful  
657 discussions. We thank Dr. Barney Graham for kindly providing the Spike-2P construct, and  
658 Dr. John Moore for providing SARS-CoV-2 full-length spike construct. This work was funded  
659 by a grant from the Bill and Melinda Gates Foundation to RV (INV-005948). The following  
660 reagent NR-52281, SARS-Related Coronavirus 2, Isolate USA-WA1/2020 was deposited by  
661 the Centers for Disease Control and Prevention and obtained through BEI Resources, NIAID,  
662 NIH: SARS-Related Coronavirus 2, Isolate USA-WA1/2020. We thank BEI Resources for

663 providing 293T-ACE2 cells submitted by Dr. Jesse Bloom. We also acknowledge funding for  
664 infrastructural support from the following programs of the Government of India: DST-FIST,  
665 UGC Center for Advanced Study, MHRD-FAST, the DBT-IISc Partnership Program, and of a  
666 JC Bose Fellowship from DST to RV. Mynvax acknowledges funding support from IISc CSR  
667 grant for COVID19 vaccine work. S.K.M acknowledges the support of the MHRD-IISc  
668 doctoral fellowship. S.D. acknowledges the support of DBT Cryo-EM facility  
669 (BT/INF/22/SP22844/2017SM). S.M. and S.B. acknowledge the intramural funding received  
670 from THSTI under Translational Research Program grant. R.P. acknowledges the support of  
671 CSIR\_IGIB grant (MLP-2005) and Fondation Botnar (CLP-0031). R.P.R. acknowledges the  
672 support of SERB grant (IPA/2020/000168).

673

#### 674 **Author Contributions**

675 R.V., S.K.M., conceptualized the work, designed the studies. S.P., R.V., R.S., planned the  
676 animal studies. R.S., performed the stable cell line work. R.S., U.R.P., P.R., A.U., performed  
677 ELISA and ACE2-hFc competition experiments. S.P., N.G., performed hCMP-mRBD protein  
678 expression and S.K.M. performed the characterization. S.G. performed hCMP-pRBD protein  
679 expression and characterization. M.S.K., performed SEC-MALS. P.K., cloned the hCMP-  
680 mRBD gene. M.B. performed the animal immunizations. I.P., S.D. provided the EM data and  
681 analysis. S.M., S.B., provided CPE neutralizing antibody assay data. R.P.R., S.K., performed  
682 pseudovirus neutralization assays. S.S, A.T., S.J., R.P. provided convalescent human serum  
683 samples. S.K.M wrote the manuscript with contributions from each author. S.K.M, R.V., led  
684 the studies and edited the paper along with all co-authors.

685

686

## 687 References

- 688 1. Chan JF-W, Yuan S, Kok K-H, To KK-W, Chu H, Yang J, Xing F, Liu J, Yip CC-Y,  
689 Poon RW-S, Tsoi H-W, Lo SK-F, Chan K-H, Poon VK-M, Chan W-M, Ip JD, Cai J-P,  
690 Cheng VC-C, Chen H, Hui CK-M, Yuen K-Y. 2020. A familial cluster of pneumonia  
691 associated with the 2019 novel coronavirus indicating person-to-person transmission: a  
692 study of a family cluster. *Lancet (London, England)* 395:514–523.
- 693 2. Zhu N, Zhang D, Wang W, Li X, Yang B, Song J, Zhao X, Huang B, Shi W, Lu R, Niu  
694 P, Zhan F, Ma X, Wang D, Xu W, Wu G, Gao GF, Tan W, China Novel Coronavirus  
695 Investigating and Research Team. 2020. A Novel Coronavirus from Patients with  
696 Pneumonia in China, 2019. *N Engl J Med* 382:727–733.
- 697 3. WHO. 2020. Coronavirus Disease (COVID-19) Dashboard. World Heal Organ.
- 698 4. Wrapp D, Wang N, Corbett KS, Goldsmith JA, Hsieh C-L, Abiona O, Graham BS,  
699 McLellan JS. 2020. Cryo-EM structure of the 2019-nCoV spike in the prefusion  
700 conformation. *Science* 367:1260–1263.
- 701 5. Walls AC, Park Y-J, Tortorici MA, Wall A, McGuire AT, Velesler D. 2020. Structure,  
702 Function, and Antigenicity of the SARS-CoV-2 Spike Glycoprotein. *Cell* 181:281-  
703 292.e6.
- 704 6. Barnes CO, Jette CA, Abernathy ME, Dam K-MA, Esswein SR, Gristick HB, Malyutin  
705 AG, Sharaf NG, Huey-Tubman KE, Lee YE, Robbiani DF, Nussenzweig MC, West AP,  
706 Bjorkman PJ. 2020. SARS-CoV-2 neutralizing antibody structures inform therapeutic  
707 strategies. *Nature* 588:682–687.
- 708 7. Barnes CO, West AP, Huey-Tubman KE, Hoffmann MAG, Sharaf NG, Hoffman PR,  
709 Koranda N, Gristick HB, Gaebler C, Muecksch F, Lorenzi JCC, Finkin S, Hägglöf T,  
710 Hurley A, Millard KG, Weisblum Y, Schmidt F, Hatziioannou T, Bieniasz PD, Caskey  
711 M, Robbiani DF, Nussenzweig MC, Bjorkman PJ. 2020. Structures of Human  
712 Antibodies Bound to SARS-CoV-2 Spike Reveal Common Epitopes and Recurrent  
713 Features of Antibodies. *Cell* 182:828-842.e16.
- 714 8. Chi X, Yan R, Zhang J, Zhang G, Zhang Y, Hao M, Zhang Z, Fan P, Dong Y, Yang Y,  
715 Chen Z, Guo Y, Zhang J, Li Y, Song X, Chen Y, Xia L, Fu L, Hou L, Xu J, Yu C, Li J,  
716 Zhou Q, Chen W. 2020. A neutralizing human antibody binds to the N-terminal domain  
717 of the Spike protein of SARS-CoV-2. *Science* 369:650–655.
- 718 9. Robbiani DF, Gaebler C, Muecksch F, Lorenzi JCC, Wang Z, Cho A, Agudelo M,  
719 Barnes CO, Gazumyan A, Finkin S, Hägglöf T, Oliveira TY, Viant C, Hurley A,  
720 Hoffmann H-H, Millard KG, Kost RG, Cipolla M, Gordon K, Bianchini F, Chen ST,  
721 Ramos V, Patel R, Dizon J, Shimeliovich I, Mendoza P, Hartweger H, Nogueira L, Pack  
722 M, Horowitz J, Schmidt F, Weisblum Y, Michailidis E, Ashbrook AW, Waltari E, Pak  
723 JE, Huey-Tubman KE, Koranda N, Hoffman PR, West AP, Rice CM, Hatziioannou T,  
724 Bjorkman PJ, Bieniasz PD, Caskey M, Nussenzweig MC. 2020. Convergent antibody  
725 responses to SARS-CoV-2 in convalescent individuals. *Nature* 584:437–442.
- 726 10. Wu Y, Wang F, Shen C, Peng W, Li D, Zhao C, Li Z, Li S, Bi Y, Yang Y, Gong Y, Xiao  
727 H, Fan Z, Tan S, Wu G, Tan W, Lu X, Fan C, Wang Q, Liu Y, Zhang C, Qi J, Gao GF,  
728 Gao F, Liu L. 2020. A noncompeting pair of human neutralizing antibodies block  
729 COVID-19 virus binding to its receptor ACE2. *Science* 368:1274–1278.

- 730 11. Cao Y, Su B, Guo X, Sun W, Deng Y, Bao L, Zhu Q, Zhang X, Zheng Y, Geng C, Chai  
731 X, He R, Li X, Lv Q, Zhu H, Deng W, Xu Y, Wang Y, Qiao L, Tan Y, Song L, Wang  
732 G, Du X, Gao N, Liu J, Xiao J, Su X, Du Z, Feng Y, Qin C, Qin C, Jin R, Xie XS. 2020.  
733 Potent Neutralizing Antibodies against SARS-CoV-2 Identified by High-Throughput  
734 Single-Cell Sequencing of Convalescent Patients' B Cells. *Cell* 182:73-84.e16.
- 735 12. Kreer C, Zehner M, Weber T, Ercanoglu MS, Gieselmann L, Rohde C, Halwe S,  
736 Korenkov M, Schommers P, Vanshylla K, Di Cristanziano V, Janicki H, Brinker R,  
737 Ashurov A, Krähling V, Kupke A, Cohen-Dvashi H, Koch M, Eckert JM, Lederer S,  
738 Pfeifer N, Wolf T, Vehreschild MJGT, Wendtner C, Diskin R, Gruell H, Becker S, Klein  
739 F. 2020. Longitudinal Isolation of Potent Near-Germline SARS-CoV-2-Neutralizing  
740 Antibodies from COVID-19 Patients. *Cell* 182:843-854.e12.
- 741 13. Liu L, Wang P, Nair MS, Yu J, Rapp M, Wang Q, Luo Y, Chan JFW, Sahi V, Figueroa  
742 A, Guo X V., Cerutti G, Bimela J, Gorman J, Zhou T, Chen Z, Yuen K-Y, Kwong PD,  
743 Sodroski JG, Yin MT, Sheng Z, Huang Y, Shapiro L, Ho DD. 2020. Potent neutralizing  
744 antibodies against multiple epitopes on SARS-CoV-2 spike. *Nature* 584:450–456.
- 745 14. Zost SJ, Gilchuk P, Case JB, Binshtein E, Chen RE, Nkolola JP, Schäfer A, Reidy JX,  
746 Trivette A, Nargi RS, Sutton RE, Suryadevara N, Martinez DR, Williamson LE, Chen  
747 EC, Jones T, Day S, Myers L, Hassan AO, Kafai NM, Winkler ES, Fox JM, Shrihari S,  
748 Mueller BK, Meiler J, Chandrashekar A, Mercado NB, Steinhardt JJ, Ren K, Loo Y-M,  
749 Kallewaard NL, McCune BT, Keeler SP, Holtzman MJ, Barouch DH, Gralinski LE,  
750 Baric RS, Thackray LB, Diamond MS, Carnahan RH, Crowe JE. 2020. Potently  
751 neutralizing and protective human antibodies against SARS-CoV-2. *Nature* 584:443–  
752 449.
- 753 15. Zost SJ, Gilchuk P, Chen RE, Case JB, Reidy JX, Trivette A, Nargi RS, Sutton RE,  
754 Suryadevara N, Chen EC, Binshtein E, Shrihari S, Ostrowski M, Chu HY, Didier JE,  
755 MacRenaris KW, Jones T, Day S, Myers L, Eun-Hyung Lee F, Nguyen DC, Sanz I,  
756 Martinez DR, Rothlauf PW, Bloyet L-M, Whelan SPJ, Baric RS, Thackray LB,  
757 Diamond MS, Carnahan RH, Crowe JE. 2020. Rapid isolation and profiling of a diverse  
758 panel of human monoclonal antibodies targeting the SARS-CoV-2 spike protein. *Nat*  
759 *Med* 26:1422–1427.
- 760 16. Kemp SA, Harvey WT, Datir RP, Collier DA, Ferreira I, Carabelli AM, Robertson DL,  
761 Gupta RK. 2020. Recurrent emergence and transmission of a SARS-CoV-2 Spike  
762 deletion  $\Delta$ H69/V70. *bioRxiv* 2020.12.14.422555.
- 763 17. Korber B, Fischer WM, Gnanakaran S, Yoon H, Theiler J, Abfalterer W, Hengartner N,  
764 Giorgi EE, Bhattacharya T, Foley B, Hastie KM, Parker MD, Partridge DG, Evans CM,  
765 Freeman TM, de Silva TI, McDanal C, Perez LG, Tang H, Moon-Walker A, Whelan  
766 SP, LaBranche CC, Saphire EO, Montefiori DC, Angyal A, Brown RL, Carrilero L,  
767 Green LR, Groves DC, Johnson KJ, Keeley AJ, Lindsey BB, Parsons PJ, Raza M,  
768 Rowland-Jones S, Smith N, Tucker RM, Wang D, Wyles MD. 2020. Tracking Changes  
769 in SARS-CoV-2 Spike: Evidence that D614G Increases Infectivity of the COVID-19  
770 Virus. *Cell* 182:812-827.e19.
- 771 18. Andreano E, Piccini G, Licastro D, Casalino L, Johnson N V, Paciello I, Monego SD,  
772 Pantano E, Manganaro N, Manenti A, Manna R, Casa E, Hyseni I, Benincasa L,  
773 Montomoli E, Amaro RE, McLellan JS, Rappuoli R. 2020. SARS-CoV-2 escape  
774 &lt;em>in vitro</em> from a highly neutralizing COVID-19 convalescent  
775 plasma. *bioRxiv* 2020.12.28.424451.

- 776 19. Greaney AJ, Loes AN, Crawford KHD, Starr TN, Malone KD, Chu HY, Bloom JD.  
777 2021. Comprehensive mapping of mutations to the SARS-CoV-2 receptor-binding  
778 domain that affect recognition by polyclonal human serum antibodies. *bioRxiv*  
779 2020.12.31.425021.
- 780 20. Kim Y-I, Kim S-M, Park S-J, Kim E-H, Yu K-M, Chang J-H, Kim EJ, Casel MAB,  
781 Rollon R, Jang S-G, Um J, Song M-S, Jeong HW, Kim E-G, Kim Y, Kim SY, Park J-S,  
782 Park MS, Kwon G-Y, Yeo SG, Lee S-A, Choi YJ, Jung JU, Choi YK. 2021. Critical role  
783 of neutralizing antibody for SARS-CoV-2 reinfection and transmission. *Emerg*  
784 *Microbes Infect* 1–28.
- 785 21. Shang J, Wan Y, Luo C, Ye G, Geng Q, Auerbach A, Li F. 2020. Cell entry mechanisms  
786 of SARS-CoV-2. *Proc Natl Acad Sci* 117:11727–11734.
- 787 22. Bosch BJ, van der Zee R, de Haan CAM, Rottier PJM. 2003. The Coronavirus Spike  
788 Protein Is a Class I Virus Fusion Protein: Structural and Functional Characterization of  
789 the Fusion Core Complex. *J Virol* 77:8801–8811.
- 790 23. Brouwer PJM, Caniels TG, van der Straten K, Snitselaar JL, Aldon Y, Bangaru S, Torres  
791 JL, Okba NMA, Claireaux M, Kerster G, Bentlage AEH, van Haaren MM, Guerra D,  
792 Burger JA, Schermer EE, Verheul KD, van der Velde N, van der Kooi A, van Schooten  
793 J, van Breemen MJ, Bijl TPL, Slieden K, Aartse A, Derking R, Bontjer I, Kootstra NA,  
794 Wiersinga WJ, Vidarsson G, Haagmans BL, Ward AB, de Bree GJ, Sanders RW, van  
795 Gils MJ. 2020. Potent neutralizing antibodies from COVID-19 patients define multiple  
796 targets of vulnerability. *Science* 369:643–650.
- 797 24. Huo J, Zhao Y, Ren J, Zhou D, Duyvesteyn HME, Ginn HM, Carrique L, Malinauskas  
798 T, Ruza RR, Shah PNM, Tan TK, Rijal P, Coombes N, Bewley KR, Tree JA, Radecke  
799 J, Paterson NG, Supasa P, Mongkolsapaya J, Sreaton GR, Carroll M, Townsend A, Fry  
800 EE, Owens RJ, Stuart DI. 2020. Neutralization of SARS-CoV-2 by Destruction of the  
801 Prefusion Spike. *Cell Host Microbe* 28:445-454.e6.
- 802 25. Pinto D, Park Y-J, Beltramello M, Walls AC, Tortorici MA, Bianchi S, Jaconi S, Culap  
803 K, Zatta F, De Marco A, Peter A, Guarino B, Spreafico R, Cameroni E, Case JB, Chen  
804 RE, Havenar-Daughton C, Snell G, Telenti A, Virgin HW, Lanzavecchia A, Diamond  
805 MS, Fink K, Veesler D, Corti D. 2020. Cross-neutralization of SARS-CoV-2 by a human  
806 monoclonal SARS-CoV antibody. *Nature* 583:290–295.
- 807 26. Rogers TF, Zhao F, Huang D, Beutler N, Burns A, He W-T, Limbo O, Smith C, Song  
808 G, Woehl J, Yang L, Abbott RK, Callaghan S, Garcia E, Hurtado J, Parren M, Peng L,  
809 Ramirez S, Ricketts J, Ricciardi MJ, Rawlings SA, Wu NC, Yuan M, Smith DM,  
810 Nemazee D, Teijaro JR, Voss JE, Wilson IA, Andrabi R, Briney B, Landais E, Sok D,  
811 Jardine JG, Burton DR. 2020. Isolation of potent SARS-CoV-2 neutralizing antibodies  
812 and protection from disease in a small animal model. *Science* 369:956–963.
- 813 27. Shi R, Shan C, Duan X, Chen Z, Liu P, Song J, Song T, Bi X, Han C, Wu L, Gao G, Hu  
814 X, Zhang Y, Tong Z, Huang W, Liu WJ, Wu G, Zhang B, Wang L, Qi J, Feng H, Wang  
815 F-S, Wang Q, Gao GF, Yuan Z, Yan J. 2020. A human neutralizing antibody targets the  
816 receptor-binding site of SARS-CoV-2. *Nature* 584:120–124.
- 817 28. Wang Q, Zhang Y, Wu L, Niu S, Song C, Zhang Z, Lu G, Qiao C, Hu Y, Yuen K-Y,  
818 Wang Q, Zhou H, Yan J, Qi J. 2020. Structural and Functional Basis of SARS-CoV-2  
819 Entry by Using Human ACE2. *Cell* 181:894-904.e9.

- 820 29. Chen W-H, Tao X, Peng B-H, Pollet J, Strych U, Bottazzi ME, Hotez PJ, Lustigman S,  
821 Du L, Jiang S, Tseng C-TK. 2020. Yeast-Expressed SARS-CoV Recombinant Receptor-  
822 Binding Domain (RBD219-N1) Formulated with Alum Induces Protective Immunity  
823 and Reduces Immune Enhancement. *bioRxiv* 2020.05.15.098079.
- 824 30. Mulligan MJ, Lyke KE, Kitchin N, Absalon J, Gurtman A, Lockhart S, Neuzil K, Raabe  
825 V, Bailey R, Swanson KA, Li P, Koury K, Kalina W, Cooper D, Fontes-Garfias C, Shi  
826 P-Y, Türeci Ö, Tompkins KR, Walsh EE, Frenck R, Falsey AR, Dormitzer PR, Gruber  
827 WC, Şahin U, Jansen KU. 2020. Phase I/II study of COVID-19 RNA vaccine BNT162b1  
828 in adults. *Nature* 586:589–593.
- 829 31. Quinlan BD, Mou H, Zhang L, Guo Y, He W, Ojha A, Parcels MS, Luo G, Li W, Zhong  
830 G, Choe H, Farzan M. 2020. The SARS-CoV-2 receptor-binding domain elicits a potent  
831 neutralizing response without antibody-dependent enhancement. *bioRxiv*  
832 2020.04.10.036418.
- 833 32. Ravichandran S, Coyle EM, Klenow L, Tang J, Grubbs G, Liu S, Wang T, Golding H,  
834 Khurana S. 2020. Antibody signature induced by SARS-CoV-2 spike protein  
835 immunogens in rabbits. *Sci Transl Med* 12:eabc3539.
- 836 33. Yang J, Wang W, Chen Z, Lu S, Yang F, Bi Z, Bao L, Mo F, Li X, Huang Y, Hong W,  
837 Yang Y, Zhao Y, Ye F, Lin S, Deng W, Chen H, Lei H, Zhang Z, Luo M, Gao H, Zheng  
838 Y, Gong Y, Jiang X, Xu Y, Lv Q, Li D, Wang M, Li F, Wang S, Wang G, Yu P, Qu Y,  
839 Yang L, Deng H, Tong A, Li J, Wang Z, Yang J, Shen G, Zhao Z, Li Y, Luo J, Liu H,  
840 Yu W, Yang M, Xu J, Wang J, Li H, Wang H, Kuang D, Lin P, Hu Z, Guo W, Cheng  
841 W, He Y, Song X, Chen C, Xue Z, Yao S, Chen L, Ma X, Chen S, Gou M, Huang W,  
842 Wang Y, Fan C, Tian Z, Shi M, Wang F-S, Dai L, Wu M, Li G, Wang G, Peng Y, Qian  
843 Z, Huang C, Lau JY-N, Yang Z, Wei Y, Cen X, Peng X, Qin C, Zhang K, Lu G, Wei X.  
844 2020. A vaccine targeting the RBD of the S protein of SARS-CoV-2 induces protective  
845 immunity. *Nature* 586:572–577.
- 846 34. Zang J, Gu C, Zhou B, Zhang C, Yang Y, Xu S, Zhang X, Zhou Y, Bai L, Wu Y, Sun  
847 Z, Zhang R, Deng Q, Yuan Z, Tang H, Qu D, Lavillette D, Xie Y, Huang Z. 2020.  
848 Immunization with the receptor-binding domain of SARS-CoV-2 elicits antibodies  
849 cross-neutralizing SARS-CoV-2 and SARS-CoV without antibody-dependent  
850 enhancement. *bioRxiv* 2020.05.21.107565.
- 851 35. Malladi SK, Singh R, Pandey S, Gayathri S, Kanjo K, Ahmed S, Khan MS, Kalita P,  
852 Girish N, Upadhyaya A, Reddy P, Pramanick I, Bhasin M, Mani S, Bhattacharyya S,  
853 Joseph J, Thankamani K, Raj VS, Dutta S, Singh R, Nadig G, Varadarajan R. 2020.  
854 Design of a highly thermotolerant, immunogenic SARS-CoV-2 spike fragment. *J Biol*  
855 *Chem* jbc.RA120.016284.
- 856 36. Tai W, He L, Zhang X, Pu J, Voronin D, Jiang S, Zhou Y, Du L. 2020. Characterization  
857 of the receptor-binding domain (RBD) of 2019 novel coronavirus: implication for  
858 development of RBD protein as a viral attachment inhibitor and vaccine. *Cell Mol*  
859 *Immunol* 17:613–620.
- 860 37. Kit Tan T, Rijal P, Rahikainen R, Keeble AH, Hussain S, Harvey R, Hayes JW, Edwards  
861 JC, McLean RK, Martini V, Pedrera M, Thakur N, Dietrich I, Shelton H, Ludi A,  
862 Wilsden G, Zagrajek AK, Bialy D, Bhat S, Stevenson P, Hollinghurst P, Tully M,  
863 Moffat K, Chiu C, Gray A, Azhar M, Mioulet V, Newman J, Burman A, Crossley S,  
864 Hammond JA, Tchilian E, Bailey D, Tuthill TJ, Graham SP, Huo J, Tree JA, Buttigieg



- 865 KR, Carroll MW, Daniels RS, McCauley JW, Howarth M, Townsend AR, Radcliffe  
866 Hospital J. 2020. A COVID-19 vaccine candidate using SpyCatcher multimerization of  
867 the SARS-CoV-2 spike protein receptor-binding domain induces potent neutralising  
868 antibody responses. *bioRxiv* 2020.08.31.275701.
- 869 38. Walls AC, Fiala B, Schäfer A, Wrenn S, Pham MN, Murphy M, Tse L V., Shehata L,  
870 O'Connor MA, Chen C, Navarro MJ, Miranda MC, Pettie D, Ravichandran R, Kraft JC,  
871 Ogohara C, Palser A, Chalk S, Lee E-C, Guerriero K, Kepl E, Chow CM, Sydeman C,  
872 Hodge EA, Brown B, Fuller JT, Dinnon KH, Gralinski LE, Leist SR, Gully KL, Lewis  
873 TB, Guttman M, Chu HY, Lee KK, Fuller DH, Baric RS, Kellam P, Carter L, Pepper  
874 M, Sheahan TP, Velesler D, King NP. 2020. Elicitation of Potent Neutralizing Antibody  
875 Responses by Designed Protein Nanoparticle Vaccines for SARS-CoV-2. *Cell*  
876 183:1367-1382.e17.
- 877 39. Brouwer PJM, Brinkkemper M, Maisonnasse P, Dereuddre-Bosquet N, Grobden M,  
878 Claireaux M, de Gast M, Marlin R, Chesnais V, Diry S, Allen JD, Watanabe Y, Giezen  
879 JM, Kerster G, Turner HL, van der Straten K, van der Linden CA, Aldon Y, Naninck T,  
880 Bontjer I, Burger JA, Poniman M, Mykytyn AZ, Okba NMA, Schermer EE, van  
881 Breemen MJ, Ravichandran R, Caniels TG, van Schooten J, Kahlaoui N, Contreras V,  
882 Lemaître J, Chapon C, Ho Tsong Fang R, Villaudy J, Sliepen K, van der Velden YU,  
883 Haagmans BL, de Bree GJ, Ginoux E, Ward AB, Crispin M, King NP, van der Werf S,  
884 van Gils MJ, Grand R Le, Sanders RW. 2020. Two-component spike nanoparticle  
885 vaccine protects macaques from SARS-CoV-2 infection. *bioRxiv* 2020.11.07.365726.
- 886 40. Bouwman KM, Tomris I, Turner HL, Van Der 4 Woude R, Bosman GP, Rockx B, Herfst  
887 S, Haagmans BL, Ward AB, Boons G-J, De Vries RP. 2020. Multimerization-and  
888 glycosylation-dependent receptor binding of SARS-1 CoV-2 spike proteins. *bioRxiv*  
889 2020.09.04.282558.
- 890 41. Dai L, Zheng T, Xu K, Han Y, Xu L, Huang E, An Y, Cheng Y, Li S, Liu M, Yang M,  
891 Li Y, Cheng H, Yuan Y, Zhang W, Ke C, Wong G, Qi J, Qin C, Yan J, Gao GF. 2020.  
892 A Universal Design of Betacoronavirus Vaccines against COVID-19, MERS, and  
893 SARS. *Cell* 182:722-733.e11.
- 894 42. Lainšček D, Fink T, Forstnerič V, Hafner-Bratkovič I, Orehek S, Strmšek Ž, Manček-  
895 Keber M, Pečan P, Esih H, Malenšek Š, Aupič J, Dekleva P, Plaper T, Vidmar S, Kadunc  
896 L, Benčina M, Omersa N, Anderluh G, Pojer F, Lau K, Hacker D, Correia B, Peterhoff  
897 D, Wagner R, Jerala R. 2020. Immune response to vaccine candidates based on different  
898 types of nanoscaffolded RBD domain of the SARS-CoV-2 spike protein. *bioRxiv*  
899 2020.08.28.244269.
- 900 43. Powell AE, Zhang K, Sanyal M, Tang S, Weidenbacher PA, Li S, Pham TD, Pak JE,  
901 Chiu W, Kim PS. 2020. A single immunization with spike-functionalized ferritin  
902 vaccines elicits neutralizing antibody responses against SARS-CoV-2 in mice. *bioRxiv*  
903 2020.08.28.272518.
- 904 44. Sliepen K, van Montfort T, Melchers M, Isik G, Sanders RW. 2015. Immunosilencing  
905 a Highly Immunogenic Protein Trimerization Domain. *J Biol Chem* 290:7436–7442.
- 906 45. Kesavardhana S, Das R, Citron M, Datta R, Ecto L, Srilatha NS, DiStefano D, Swoyer  
907 R, Joyce JG, Dutta S, LaBranche CC, Montefiori DC, Flynn JA, Varadarajan R. 2017.  
908 Structure-based Design of Cyclically Permuted HIV-1 gp120 Trimers That Elicit  
909 Neutralizing Antibodies. *J Biol Chem* 292:278–291.

- 910 46. Marcandalli J, Fiala B, Ols S, Perotti M, de van der Schueren W, Snijder J, Hodge E,  
911 Benhaim M, Ravichandran R, Carter L, Sheffler W, Brunner L, Lawrenz M, Dubois P,  
912 Lanzavecchia A, Sallusto F, Lee KK, Velesler D, Correnti CE, Stewart LJ, Baker D, Loré  
913 K, Perez L, King NP. 2019. Induction of Potent Neutralizing Antibody Responses by a  
914 Designed Protein Nanoparticle Vaccine for Respiratory Syncytial Virus. *Cell* 176:1420-  
915 1431.e17.
- 916 47. Brouwer PJM, Antanasijevic A, Berndsen Z, Yasmeen A, Fiala B, Bijl TPL, Bontjer I,  
917 Bale JB, Sheffler W, Allen JD, Schorcht A, Burger JA, Camacho M, Ellis D, Cottrell  
918 CA, Behrens A-J, Catalano M, del Moral-Sánchez I, Ketas TJ, LaBranche C, van Gils  
919 MJ, Sliepen K, Stewart LJ, Crispin M, Montefiori DC, Baker D, Moore JP, Klasse PJ,  
920 Ward AB, King NP, Sanders RW. 2019. Enhancing and shaping the immunogenicity of  
921 native-like HIV-1 envelope trimers with a two-component protein nanoparticle. *Nat*  
922 *Commun* 10:4272.
- 923 48. Ueda G, Antanasijevic A, Fallas JA, Sheffler W, Copps J, Ellis D, Hutchinson GB,  
924 Moyer A, Yasmeen A, Tsybovsky Y, Park Y-J, Bick MJ, Sankaran B, Gillespie RA,  
925 Brouwer PJ, Zwart PH, Velesler D, Kanekiyo M, Graham BS, Sanders RW, Moore JP,  
926 Klasse PJ, Ward AB, King NP, Baker D. 2020. Tailored design of protein nanoparticle  
927 scaffolds for multivalent presentation of viral glycoprotein antigens. *Elife* 9.
- 928 49. López-Sagaseta J, Malito E, Rappuoli R, Bottomley MJ. 2016. Self-assembling protein  
929 nanoparticles in the design of vaccines. *Comput Struct Biotechnol J* 14:58–68.
- 930 50. Kesavardhana S, Varadarajan R. 2014. Stabilizing the Native Trimer of HIV-1 Env by  
931 Destabilizing the Heterodimeric Interface of the gp41 Postfusion Six-Helix Bundle. *J*  
932 *Virol*2014/06/13. 88:9590–9604.
- 933 51. Jones AT, Chamcha V, Kesavardhana S, Shen X, Beaumont D, Das R, Wyatt LS,  
934 LaBranche CC, Stanfield-Oakley S, Ferrari G, Montefiori DC, Moss B, Tomaras GD,  
935 Varadarajan R, Amara RR. 2017. A Trimeric HIV-1 Envelope gp120 Immunogen  
936 Induces Potent and Broad Anti-V1V2 Loop Antibodies against HIV-1 in Rabbits and  
937 Rhesus Macaques. *J Virol* 92:e01796-17.
- 938 52. Jones AT, Shen X, Walter KL, LaBranche CC, Wyatt LS, Tomaras GD, Montefiori DC,  
939 Moss B, Barouch DH, Clements JD, Kozlowski PA, Varadarajan R, Amara RR. 2019.  
940 HIV-1 vaccination by needle-free oral injection induces strong mucosal immunity and  
941 protects against SHIV challenge. *Nat Commun* 10:798.
- 942 53. Saha P, Bhattacharyya S, Kesavardhana S, Miranda ER, Ali PSS, Sharma D,  
943 Varadarajan R. 2012. Designed cyclic permutants of HIV-1 gp120: implications for  
944 envelope trimer structure and immunogen design. *Biochemistry* 51:1836–47.
- 945 54. de Jonge J, van Dijken H, de Heij F, Spijkers S, Mouthaan J, de Jong R, Roholl P, Adami  
946 EA, Akamatsu MA, Ho PL, Brunner L, Collin N, Friede M, Ferreira JA, Luytjes W.  
947 2020. H7N9 influenza split vaccine with SWE oil-in-water adjuvant greatly enhances  
948 cross-reactive humoral immunity and protection against severe pneumonia in ferrets. *npj*  
949 *Vaccines* 5:38.
- 950 55. Keech C, Albert G, Cho I, Robertson A, Reed P, Neal S, Plested JS, Zhu M, Cloney-  
951 Clark S, Zhou H, Smith G, Patel N, Frieman MB, Haupt RE, Logue J, McGrath M,  
952 Weston S, Piedra PA, Desai C, Callahan K, Lewis M, Price-Abbott P, Formica N, Shinde  
953 V, Fries L, Lickliter JD, Griffin P, Wilkinson B, Glenn GM. 2020. Phase 1–2 Trial of a  
954 SARS-CoV-2 Recombinant Spike Protein Nanoparticle Vaccine. *N Engl J Med*

955 383:2320–2332.

956 56. Vogel AB, Kanevsky I, Che Y, Swanson KA, Muik A, Vormehr M, Kranz LM, Walzer  
957 KC, Hein S, Güler A, Loschko J, Maddur MS, Ota-Setlik A, Tompkins K, Cole J, Lui  
958 BG, Ziegenhals T, Plaschke A, Eisel D, Dany SC, Fesser S, Erbar S, Bates F, Schneider  
959 D, Jesionek B, Sängler B, Wallisch A-K, Feuchter Y, Junginger H, Krumm SA, Heinen  
960 AP, Adams-Quack P, Schlereth J, Schille S, Kröner C, de la Caridad Güimil Garcia R,  
961 Hiller T, Fischer L, Sellers RS, Choudhary S, Gonzalez O, Vascotto F, Gutman MR,  
962 Fontenot JA, Hall-Ursone S, Brasky K, Griffor MC, Han S, Su AAH, Lees JA, Nedoma  
963 NL, Mashalidis EH, Sahasrabudhe P V, Tan CY, Pavliakova D, Singh G, Fontes-Garfias  
964 C, Pride M, Scully IL, Ciolino T, Obregon J, Gazi M, Carrion R, Alfson KJ, Kalina W  
965 V, Kaushal D, Shi P-Y, Klamp T, Rosenbaum C, Kuhn AN, Türeci Ö, Dormitzer PR,  
966 Jansen KU, Sahin U. 2020. BNT162b vaccines are immunogenic and protect non-human  
967 primates against SARS-CoV-2. *bioRxiv* 2020.12.11.421008.

968 57. Yuan M, Wu NC, Zhu X, Lee C-CD, So RTY, Lv H, Mok CKP, Wilson IA. 2020. A  
969 highly conserved cryptic epitope in the receptor binding domains of SARS-CoV-2 and  
970 SARS-CoV. *Science* 368:630–633.

971 58. Bell JM, Chen M, Baldwin PR, Ludtke SJ. 2016. High resolution single particle  
972 refinement in EMAN2.1. *Methods* 100:25–34.

973 59. Reboul CF, Eager M, Elmlund D, Elmlund H. 2018. Single-particle cryo-EM-Improved  
974 ab initio 3D reconstruction with SIMPLE/PRIME. *Protein Sci* 27:51–61.

975

976

977

978

979

980

981

982

983

984

985

986 **Figure Legends**

987 **Figure 1. Design of trimeric mRBD. A.** The design utilized the RBD (residues 332-532) from  
988 the closed state of the Spike-2P (PDB 6VXX) aligned coaxially with the hCMP trimerization  
989 domain, coordinates taken from the homolog CCMP (PDB:1AQ5, Chain 1.1). The N termini  
990 of mRBD are labelled as I332 and the hCMP trimerization domain C-termini are labelled as  
991 V340. The N, C termini  $C\alpha$ 's form vertices of equilateral triangles. The N-terminal plane of  
992 RBD (I332) is separated from the C-terminal plane (V340) of the hCMP trimerization domain  
993 by  $\sim 22.1$  Å to avoid steric clashes. The I332 terminus and V340 terminus are  $\sim 39$  Å apart in  
994 the modelled structure and are connected by a 14-residue long linker. **B.** The final trimeric  
995 RBD construct consists of N-terminal hCMP trimerization domain fused to I332 of RBD by a  
996 linker (L14) followed by an HRV3C precision protease cleavage site and a 10x Histidine tag  
997 at the C-terminus.

998

999 **Figure 2. Design and characterization of trimeric mRBD. A.** SEC elution profile of trimeric  
1000 hCMP-mRBD. **B.** SDS-PAGE of purified mRBD and hCMP-mRBD in reducing and non-  
1001 reducing conditions demonstrating formation of disulfide-linked trimers. **C.** SEC-MALS of Ni-  
1002 NTA purified hCMP-mRBD (MW:  $110 \pm 10$  kDa). The red, black and blue profiles are of the  
1003 molar mass fit, molar mass and refractive index (RI) respectively. **D.** nanoDSF equilibrium  
1004 thermal unfolding of purified trimeric hCMP-mRBD. **E.** SPR binding sensorgrams of trimeric  
1005 mRBD binding to ACE2-hFc, and CR3022. The binding studies were performed with hCMP-  
1006 mRBD proteins with concentrations of 100nM, 50nM, 25nM, 12.5nM and 6.25nM depicted  
1007 from top to bottom, respectively.

1008

1009

1010 **Figure 3. Negative staining TEM analysis of hCMP-mRBD:** **A.** A representative negative staining  
1011 image of hCMP-mRBD protein. **B.** Representative reference free 2D class averages of hCMP-mRBD.  
1012 2D class averages indicate that hCMP-mRBD protein is monodisperse and stable. The protein forms a  
1013 stable trimer. The bottom panel shows the enlarged view of class 1 and 7, trimeric hCMP-mRBD  
1014 protein.

1015

1016 **Figure 4. Characterization of trimeric hCMP-mRBD following transient exposure to**  
1017 **elevated temperature.** **A.** hCMP-mRBD in PBS at a concentration of 0.2 mg/ml was subjected  
1018 to transient thermal stress for one hour and binding studies performed at 100nM. **B.**  
1019 Lyophilized hCMP-mRBD was subjected to transient thermal stress for 90 minutes followed  
1020 by reconstitution in water. The binding to ACE2-hFc was performed at 100nM. ACE2-hFc  
1021 immobilized was 800RU. hCMP-mRBD is highly resistant to transient thermal stress.

1022

1023 **Figure 5. hCMP-mRBD functionality after extended incubation at 37 °C.** SPR  
1024 sensorgrams of ACE2-hFc binding to hCMP-mRBD subjected to thermal stress **A.** hCMP-  
1025 mRBD (0.2 mg/ml) in solution subjected to 37 °C incubation as a function of time (3-72 hr) **B.**  
1026 Lyophilized hCMP-mRBD subjected to extended thermal stress at 4 °C and 37 °C for 2 and 4  
1027 weeks. 100nM of hCMP-mRBD was used as analyte. **C), D)** Equilibrium thermal unfolding  
1028 monitored by nanoDSF. **C.** hCMP-mRBD (0.2mg/ml) subjected to 37 °C incubation in 1xPBS  
1029 for upto 72 hours. **D.** nanoDSF of lyophilized hCMP-mRBD incubated for upto 4 weeks at 4  
1030 °C and 37 °C. The lyophilized protein was reconstituted in MilliQ grade water prior to thermal  
1031 melt and SPR binding studies.

1032

1033

1034 **Figure 6. ELISA, ACE2 receptor inhibition, pseudovirus neutralization and replicative**  
1035 **virus neutralization of sera elicited by hCMP-mRBD after two immunizations.** Guinea  
1036 pigs (GP) (○) and Mice (M) (●) were immunized at week 0 and 3 with 20µg of hCMP-mRBD  
1037 adjuvanted with AddaVax™ (white panel) or Alhydrogel + CpG (gray panel). At 14 days post  
1038 boost, sera were assayed for **A-E** ELISA binding titer against **A.** mRBD **B.** Spike-2P **C.** hCMP-  
1039 mRBD **D.** hCMP V1cyc JRFL gp120 **E.** JRFL gp120 **F.** ACE2-hFc receptor competition  
1040 binding titer **G.** Pseudoviral neutralization titer including Human Convalescent serum (◇)  
1041 (HCS) (ID<sub>50</sub>) utilizing pNL4-3.Luc. SARS-CoV-2 D614G Δ19 **H.** Replicative SARS-CoV-2  
1042 USA-WA1/2020 virus neutralization titer (NT<sub>100</sub>). The black horizontal lines in each scatter  
1043 plot represent Geometric Mean Titer (GMT). The pairwise titer comparisons were performed  
1044 utilizing two-tailed Mann-Whitney test (\* indicates  $p < 0.05$ , \*\* indicates  $p < 0.01$ , \*\*\*  
1045 indicates  $p < 0.001$ , \*\*\*\* indicates  $p < 0.0001$ ).

**Figure 1**

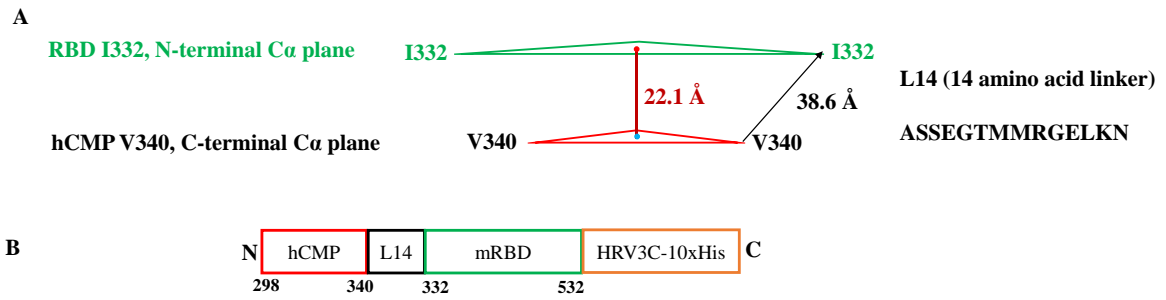

**Figure 2**

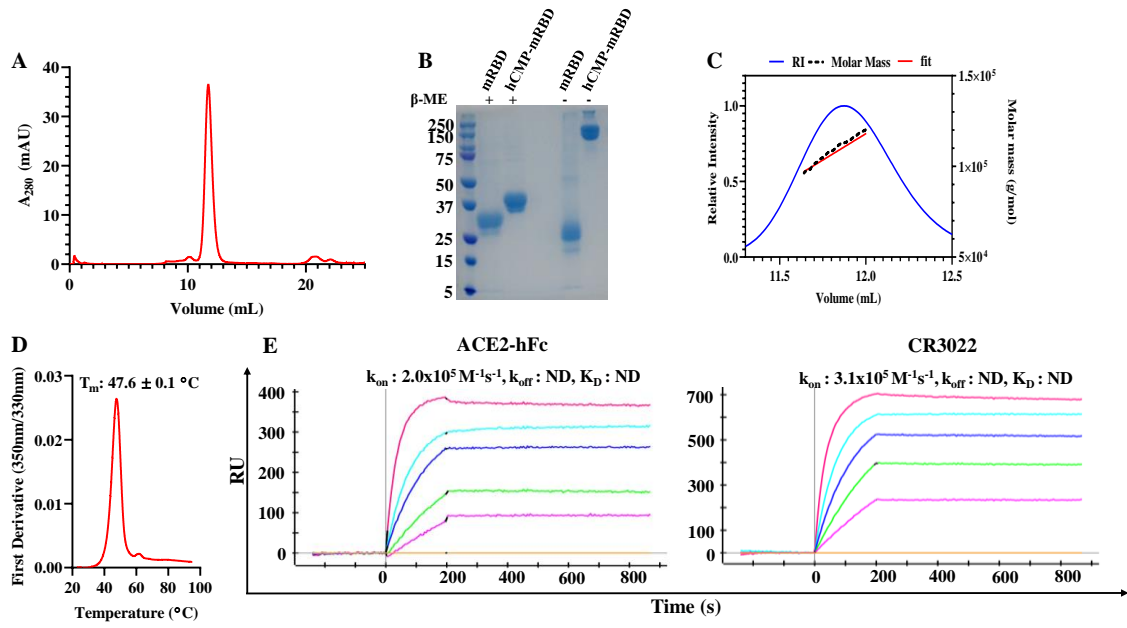



**Figure 3**

**A. Negative staining micrograph**

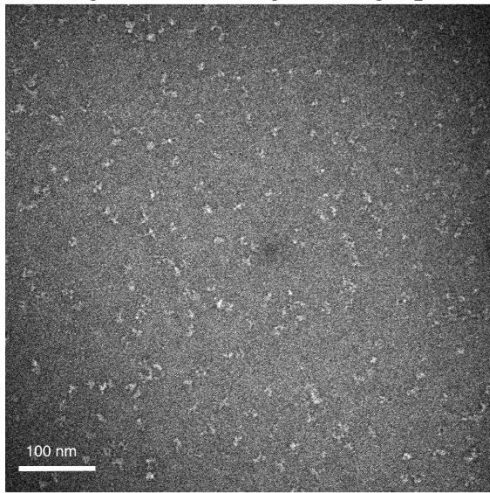

**B. Negative staining 2D Classification**

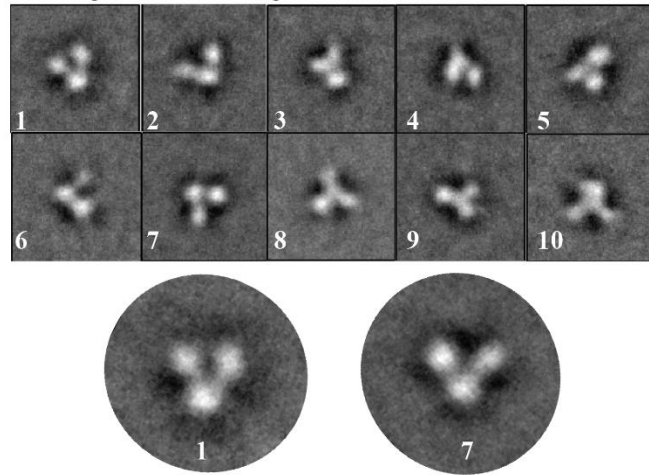

Figure 4

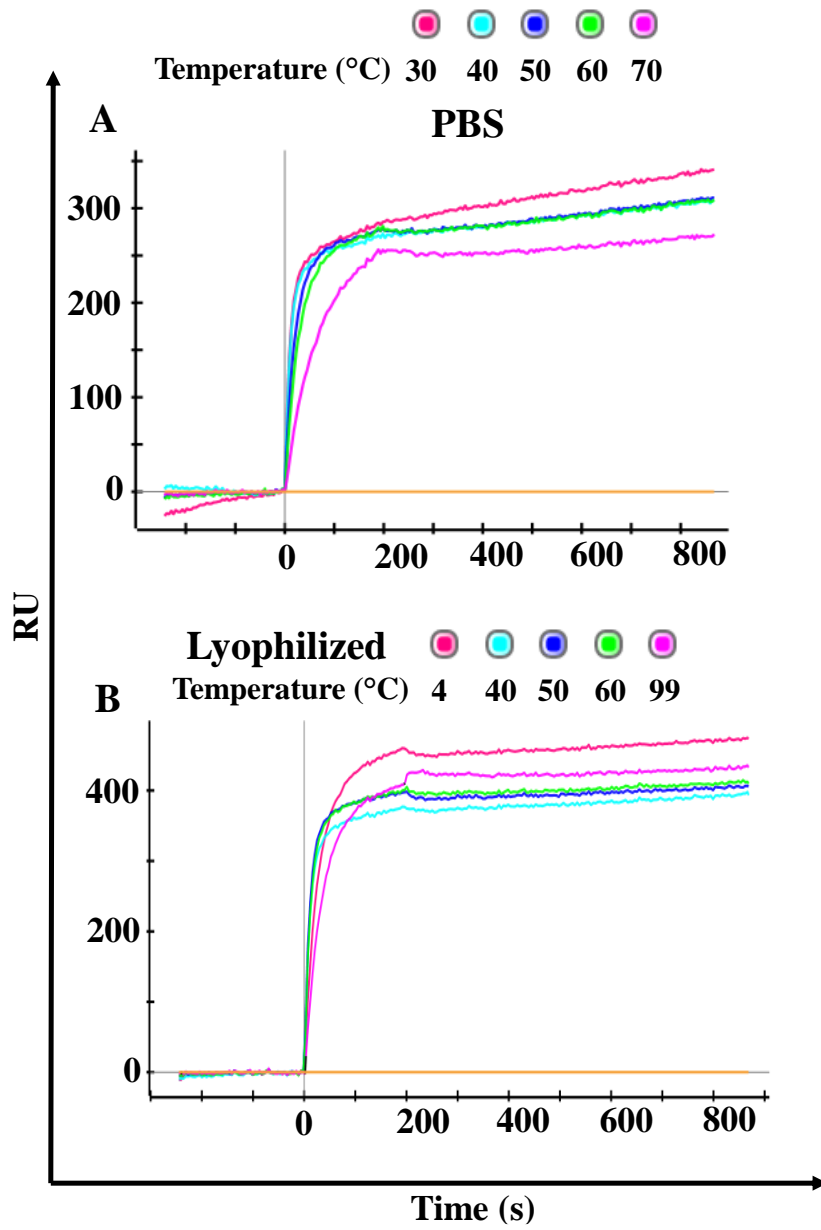

Figure 5

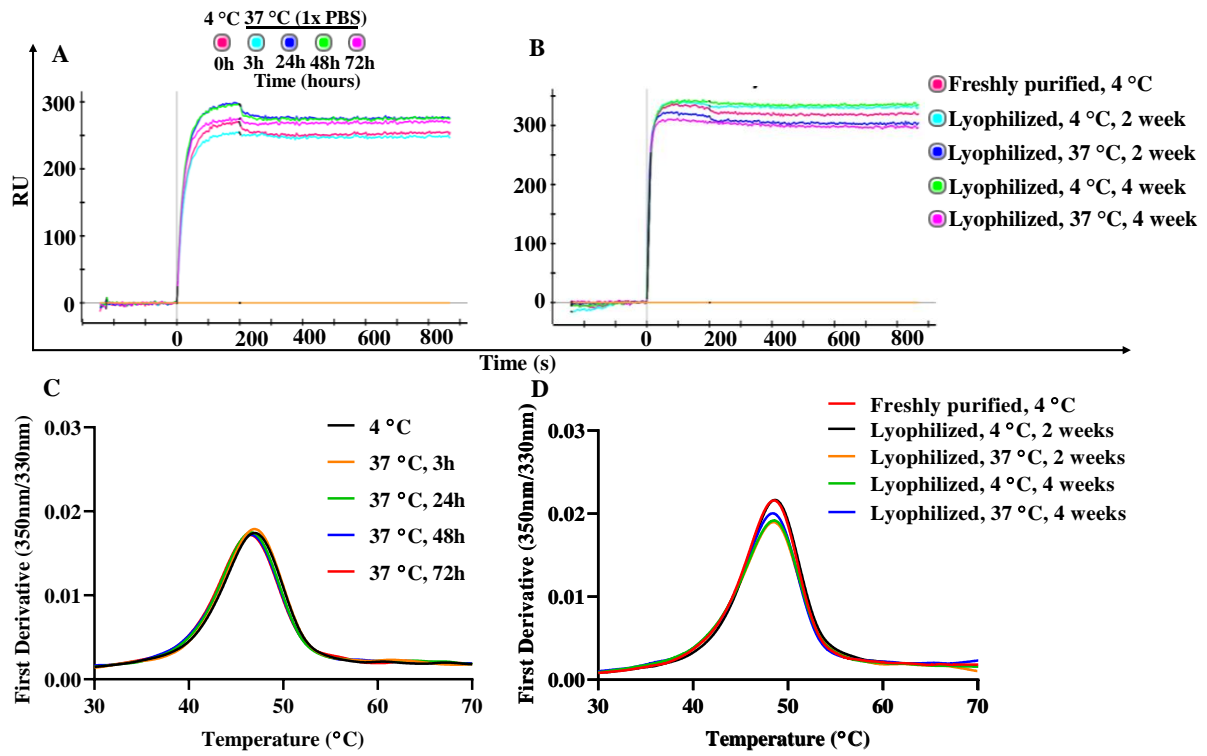

**Figure 6**

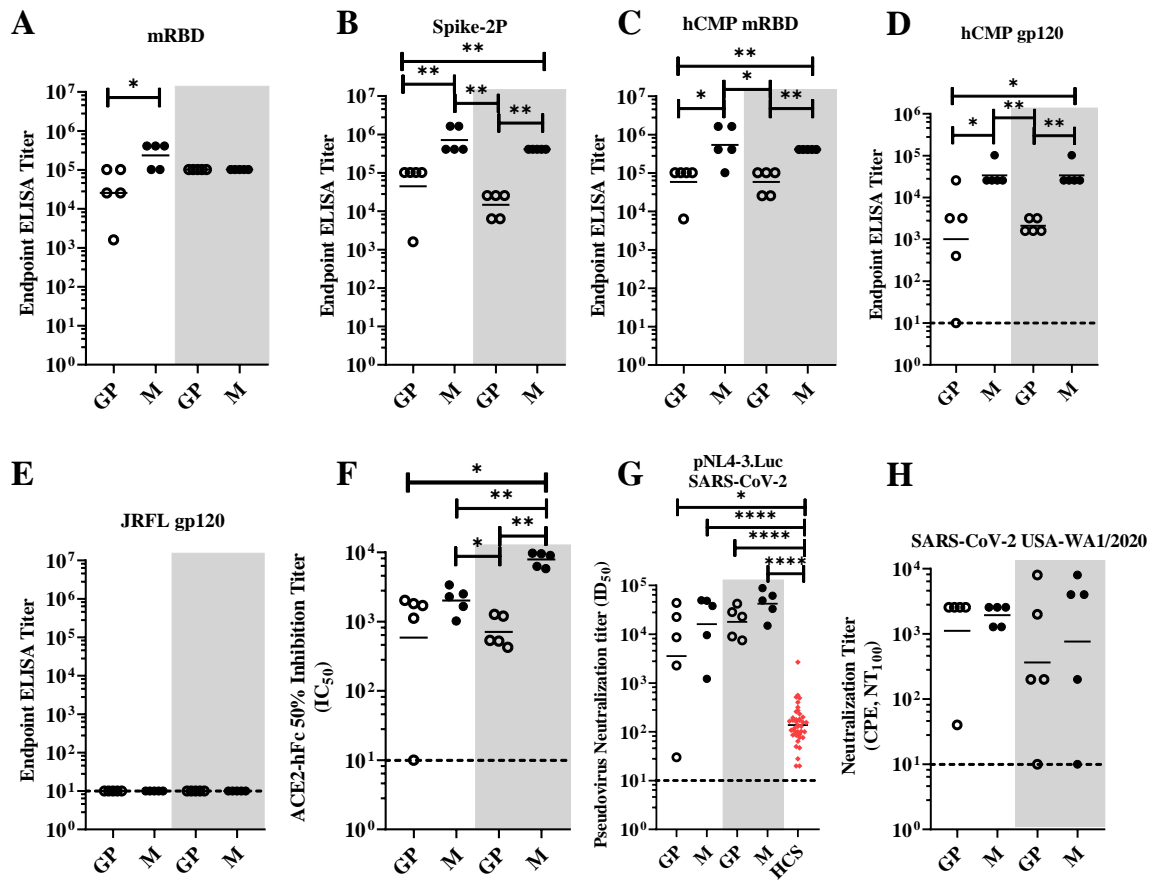

Source: https://biorxiv.org/content/10.1101/2021.01.13.426626v1.full.pdf
